# Supplementary material for: Facile synthesis of unusual glycosyl carbamates and amino acid glycosides from propargyl 1,2-orthoesters as glycosyl donors
Source: Royal Society of Chemistry journal article supplement (doi:10.1039/c1ob05056g), 2011-01-01
Supplement: c1ob05056g.pdf [file c1ob05056g.pdf]

## Facile Synthesis of Unusual Glycosyl Carbamates and Amino Acid Glycosides from Propargyl 1,2-Orthoesters as Glycosyl Donors

Ashif Y. Shaikh,<sup>a</sup> Gopalsamy Sureshkumar,<sup>a</sup> Debasis Pati,<sup>b</sup> Sayam Sen Gupta<sup>b</sup> and Srinivas Hotha<sup>\*a,c</sup>

<sup>a</sup> *Division of Organic Chemistry, Combi Chem - BioResource Center, <sup>b</sup>Chemical Engineering & Process Development National Chemical Laboratory (CSIR), Dr. Homi Bhabha Road, PUNE – 411 008, India;*  
<sup>c</sup> *Department of Chemistry, Indian Institute of Science Education & Research, PUNE – 411 008, India.*

*s.hotha@iiserpune.ac.in*

### Contents

|                                                              | <b>Page<br/>Number</b> |
|--------------------------------------------------------------|------------------------|
| General Experimental Techniques                              | S2                     |
| Abstract                                                     | S2                     |
| Characterization Data of Glycopolypeptide <b>7b</b>          | S3-S4                  |
| <sup>1</sup> H, <sup>13</sup> C and DEPT NMR Spectral Charts | S5 – S231              |
| Mass Spectral and Optical Rotation Data                      | S32                    |

## General Experimental Techniques and Apparatus

Unless otherwise noted, materials were obtained from commercial suppliers and were used without further purification. Unless otherwise reported all reactions were performed under argon atmosphere. Removal of solvent *in vacuo* refers to distillation using a rotary evaporator attached to an efficient vacuum pump. Products obtained as solids or syrups were dried under high vacuum. AuCl<sub>3</sub> was purchased from multi-national commercial vendors. Analytical thin-layer chromatography was performed on pre-coated silica plates (F<sub>254</sub>, 0.25 mm thickness); compounds were visualized by UV light or by staining with anisaldehyde spray. <sup>1</sup>H, <sup>13</sup>C NMR spectra were recorded on 200 MHz for <sup>1</sup>H and 50 MHz for <sup>13</sup>C NMR or 400 MHz for <sup>1</sup>H and 100 MHz for <sup>13</sup>C NMR or 500 MHz for <sup>1</sup>H and 125 MHz for <sup>13</sup>C NMR spectrometers. HRMS data was recorded on MALDI-TOF using 2,5-dihydroxybenzoic acid as the solid matrix. Chemical shifts ( $\delta_{\text{H}}$ ) are quoted in ppm and are referenced to tetramethylsilane (internal). Size-exclusion chromatography of the glycopolypeptides was performed using an instrument equipped with Waters 590 pump with an Spectra System RI-150 RI detector. Separations were effected by 10<sup>5</sup> and 10<sup>3</sup> Å Phenomenex 5 $\mu$  columns using 0.1M LiBr in DMF eluent at 60 °C at the samples concentrations of 5mg/ml. A constant flow rate of 1 mL/min was maintained, and the instrument was calibrated using polystyrene standards.

### Characterization of glycopeptide 7b:

$^1\text{H}$  NMR ( $\text{CDCl}_3$ , 500.13MHz) Spectrum of Compound 7b

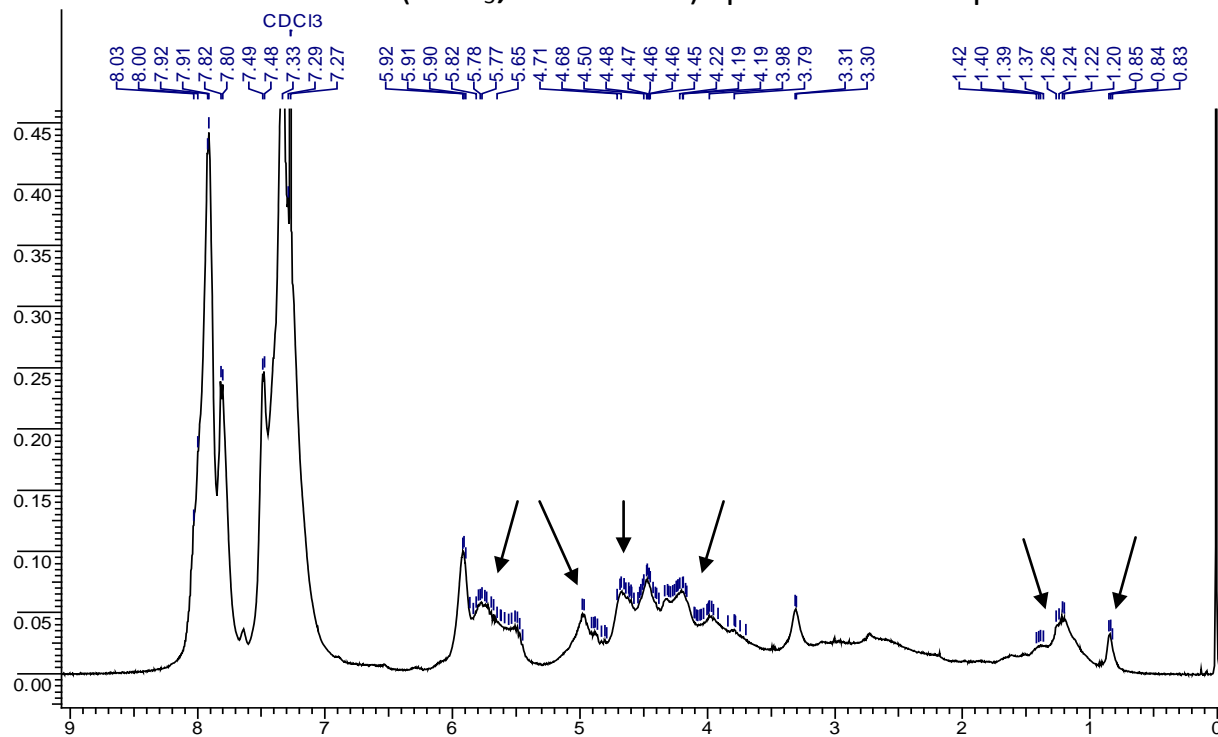

$^{13}\text{C}$  NMR ( $\text{CDCl}_3$ , 124.32 MHz) Spectrum of Compound 7b

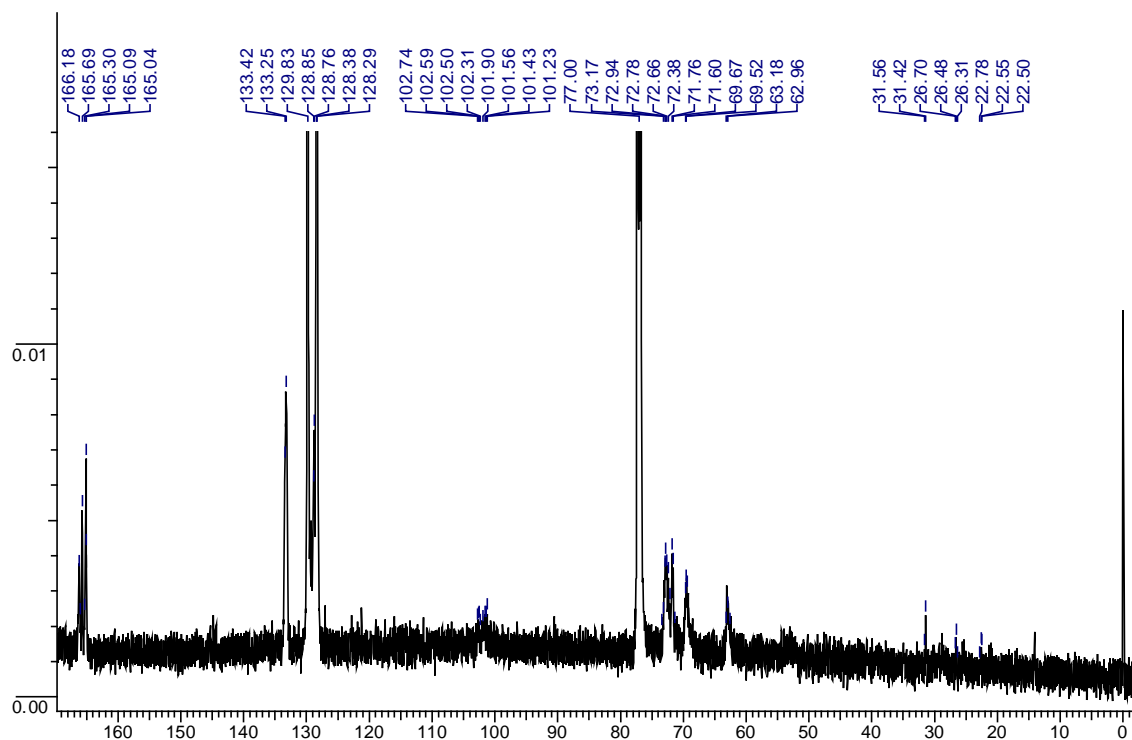

Size Exclusion Chromatogram of Glycopolypeptide **7b**

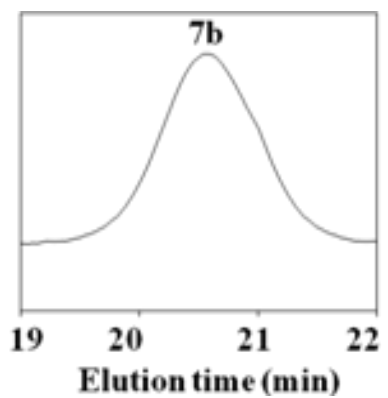

GPC of polymer **7b** (DMF/0.1M LiBr, 60 °C, RI)

### $^1\text{H}$ NMR ( $\text{CDCl}_3$ , 200.13MHz) Spectrum of Compound **3a**

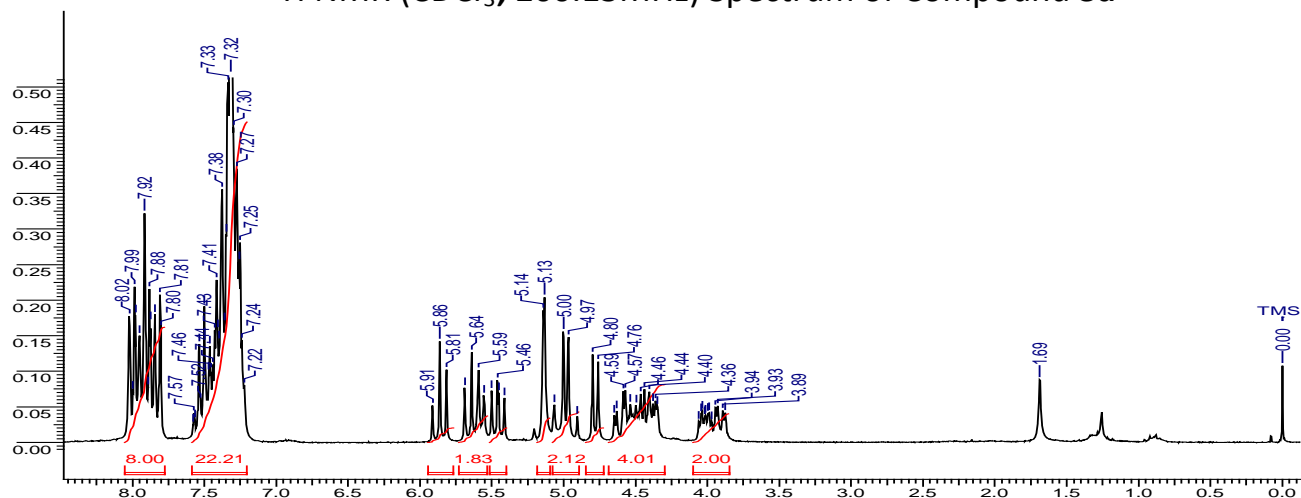

### $^{13}\text{C}$ NMR ( $\text{CDCl}_3$ , 50.32 MHz) Spectrum of Compound **3a**

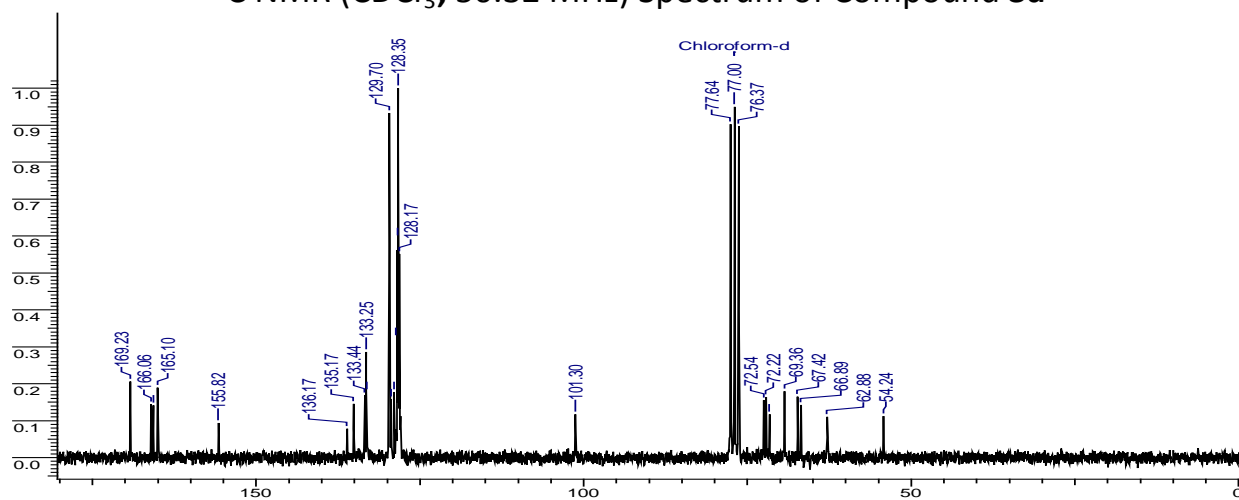

### DEPT NMR ( $\text{CDCl}_3$ , 50.32 MHz) Spectrum of Compound **3a**

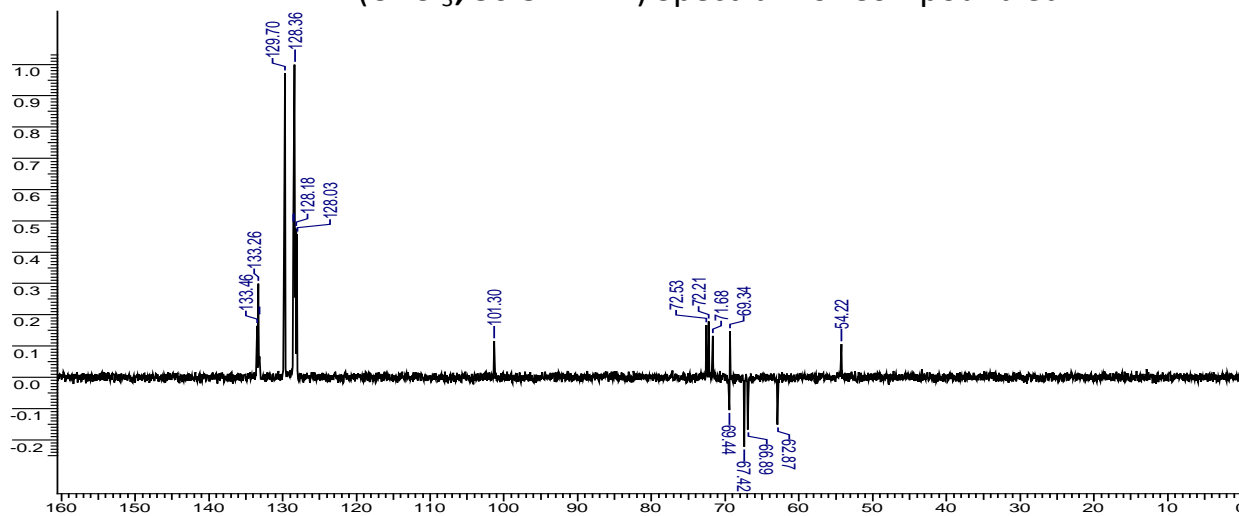

<sup>1</sup>H NMR (CDCl<sub>3</sub>, 200.13MHz) Spectrum of Compound **3b**

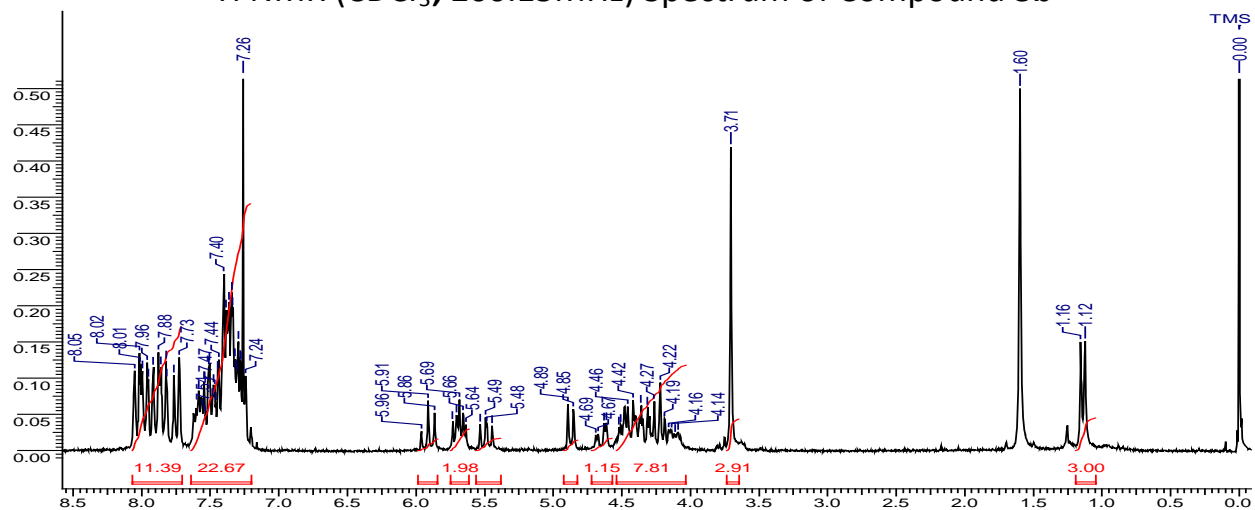

<sup>13</sup>C NMR (CDCl<sub>3</sub>, 50.32 MHz) Spectrum of Compound **3b**

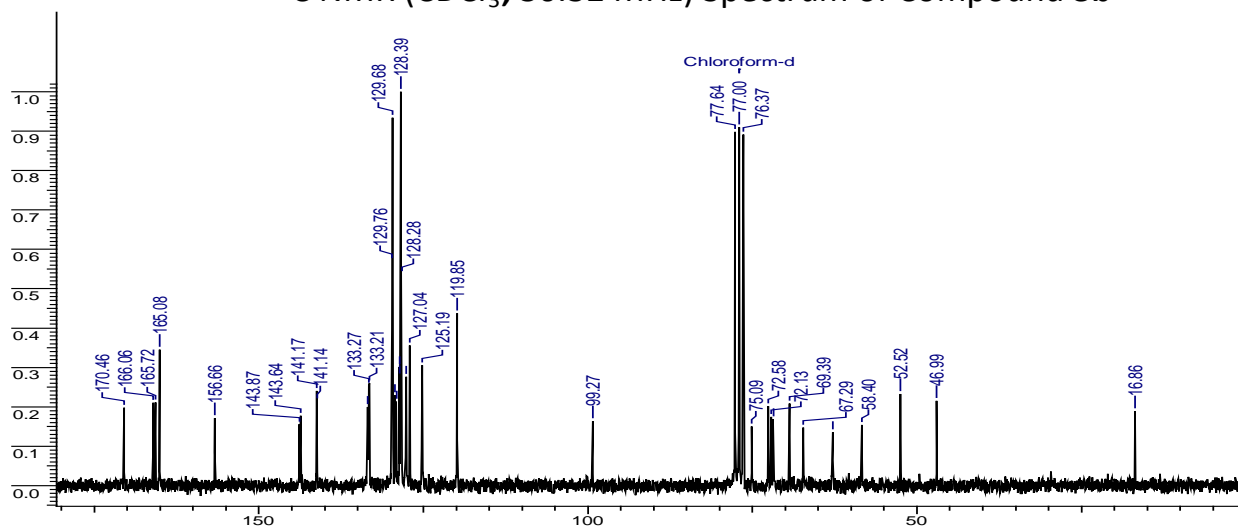

DEPT NMR (CDCl<sub>3</sub>, 50.32 MHz) Spectrum of Compound **3b**

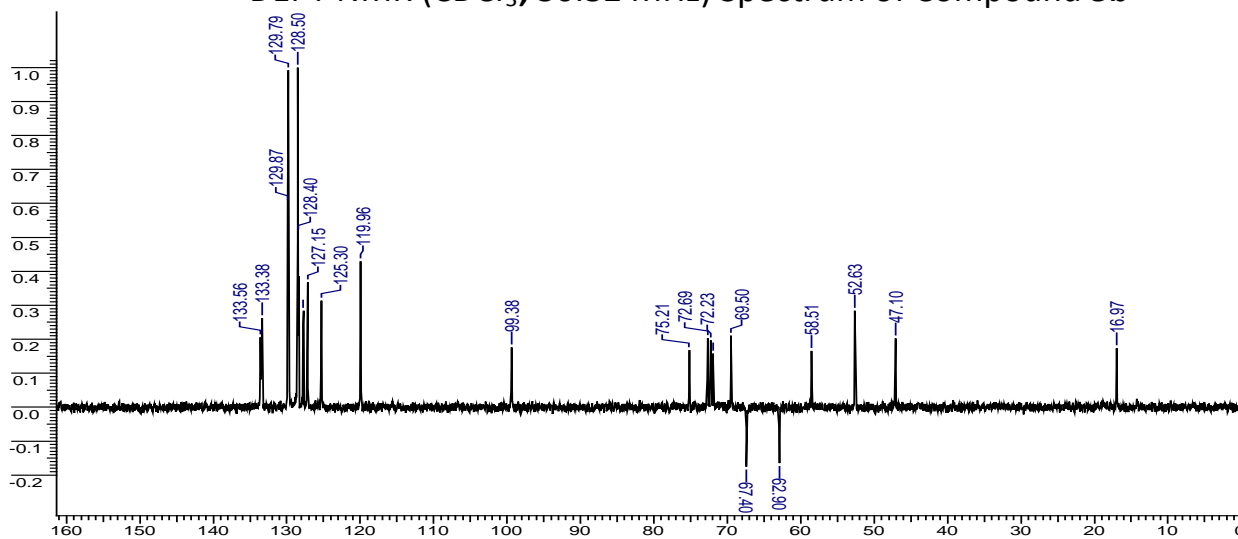

### $^1\text{H}$ NMR ( $\text{CDCl}_3$ , 200.13MHz) Spectrum of Compound **3c**

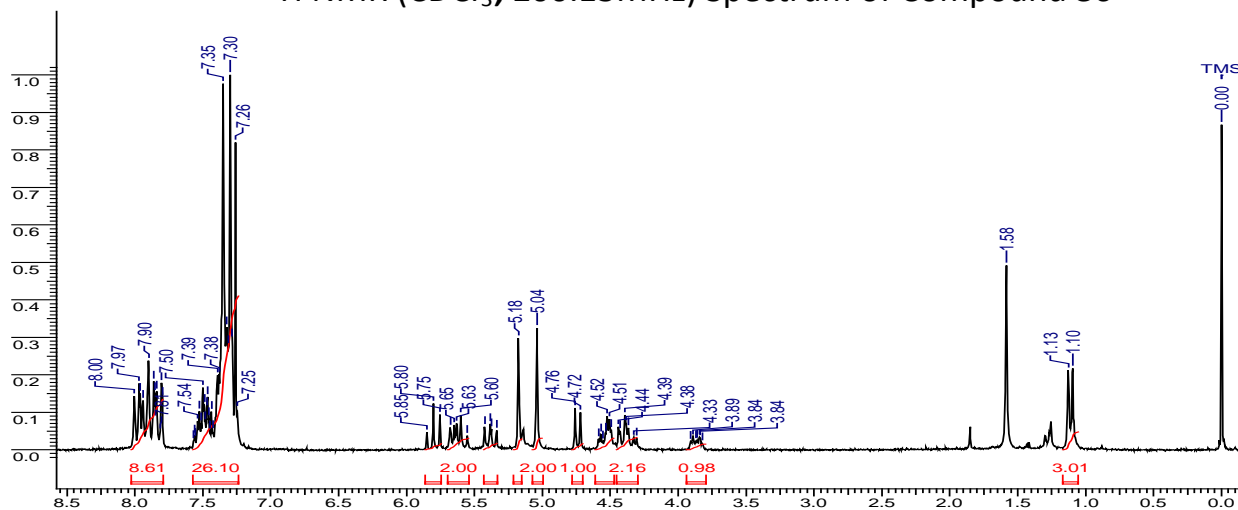

### $^{13}\text{C}$ NMR ( $\text{CDCl}_3$ , 50.32 MHz) Spectrum of Compound **3c**

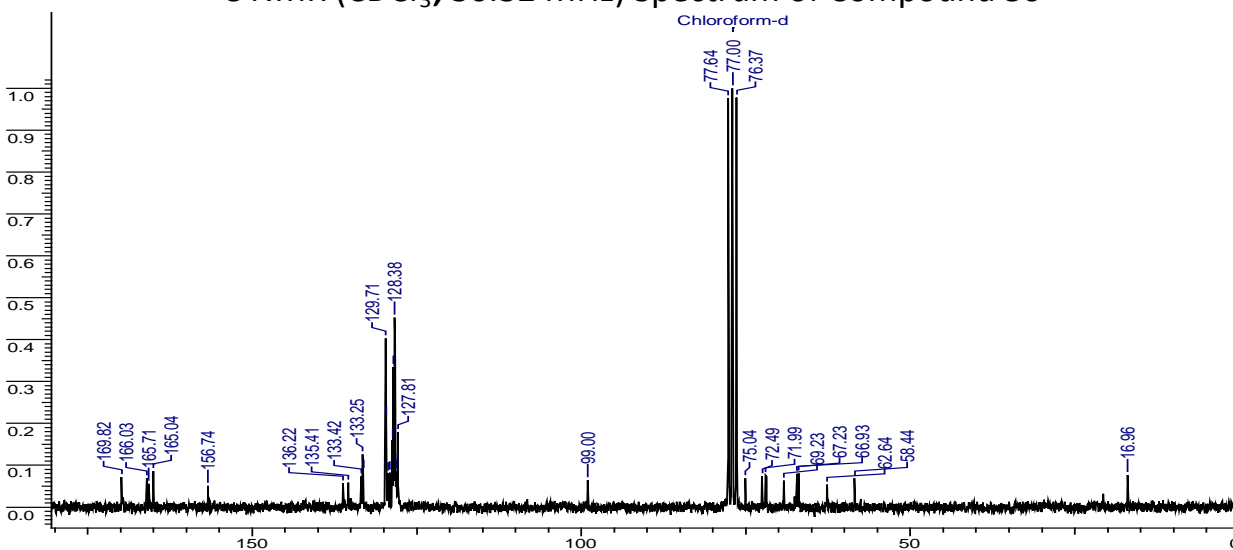

### DEPT NMR ( $\text{CDCl}_3$ , 50.32 MHz) Spectrum of Compound **3c**

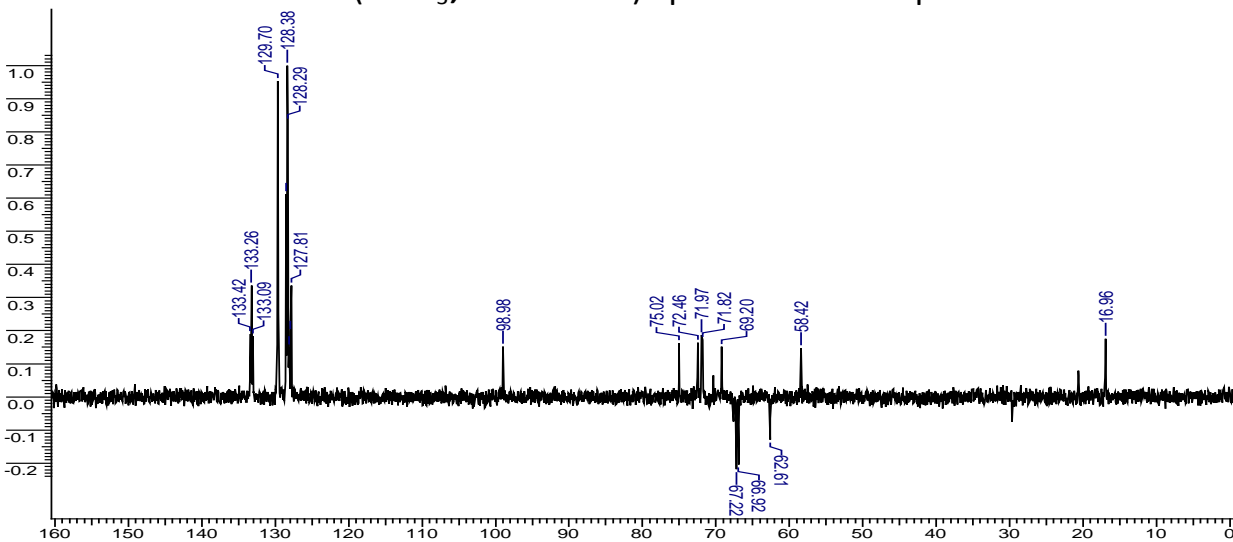

### $^1\text{H}$ NMR ( $\text{CDCl}_3$ , 200.13MHz) Spectrum of Compound 4a

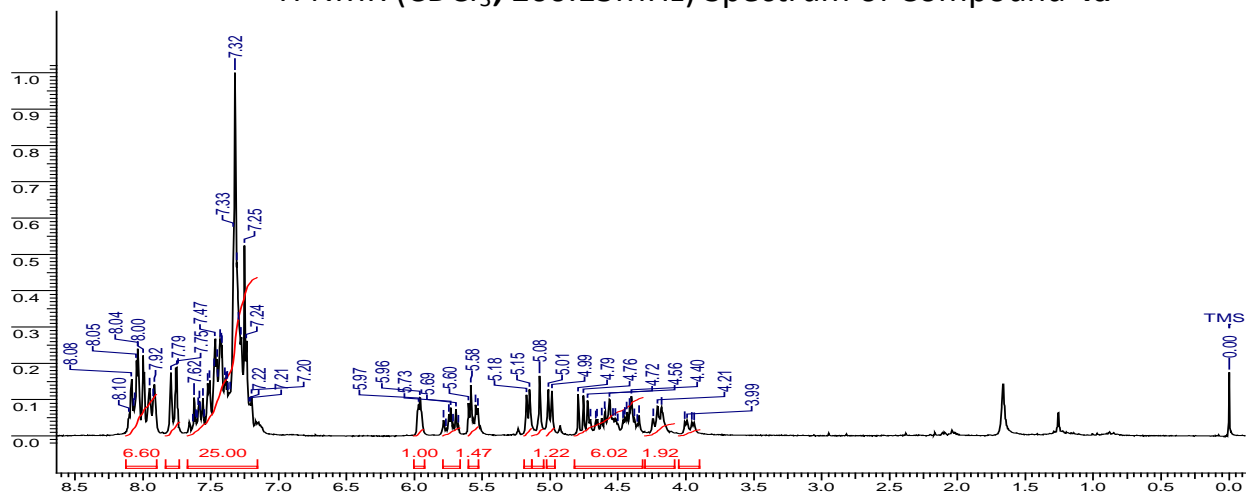

### $^{13}\text{C}$ NMR ( $\text{CDCl}_3$ , 50.32 MHz) Spectrum of Compound 4a

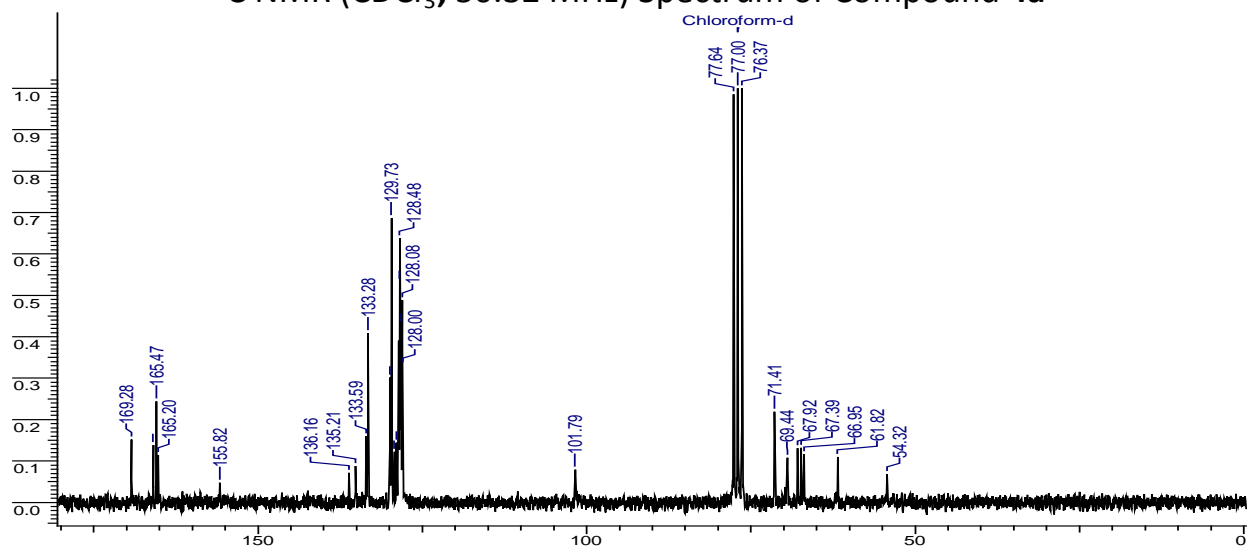

### DEPT NMR ( $\text{CDCl}_3$ , 50.32 MHz) Spectrum of Compound 4a

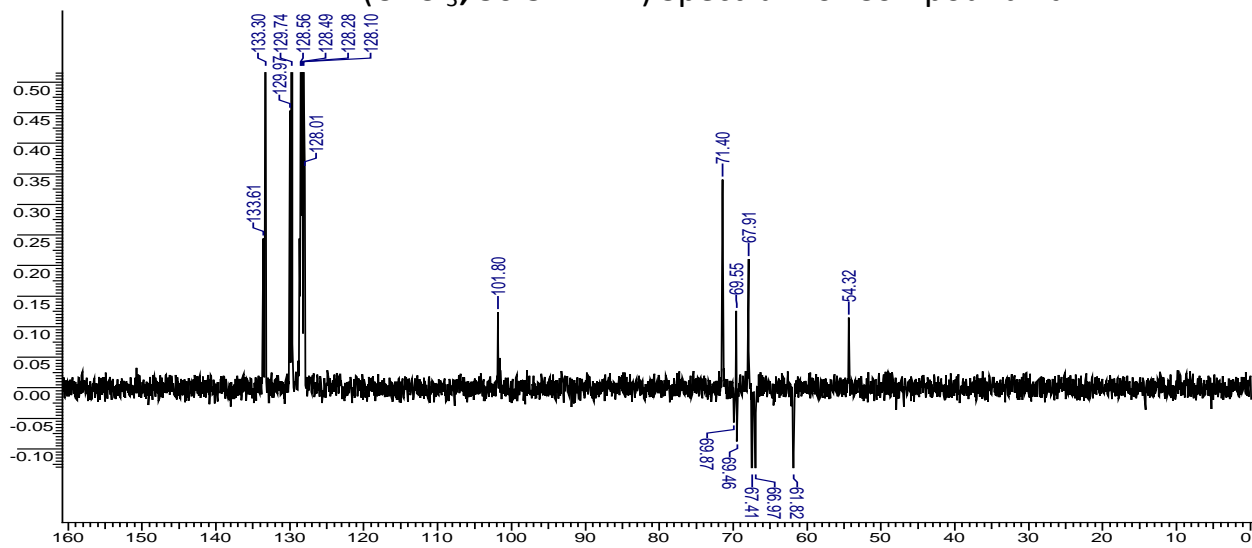



### $^1\text{H}$ NMR ( $\text{CDCl}_3$ , 200.13MHz) Spectrum of Compound **4b**

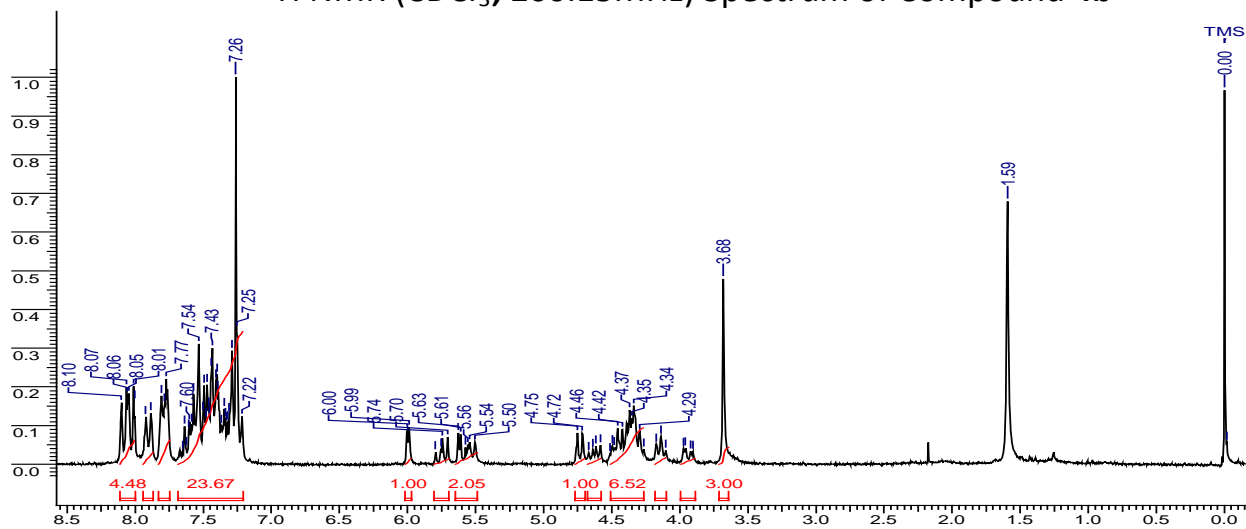

### $^{13}\text{C}$ NMR ( $\text{CDCl}_3$ , 50.32 MHz) Spectrum of Compound **4b**

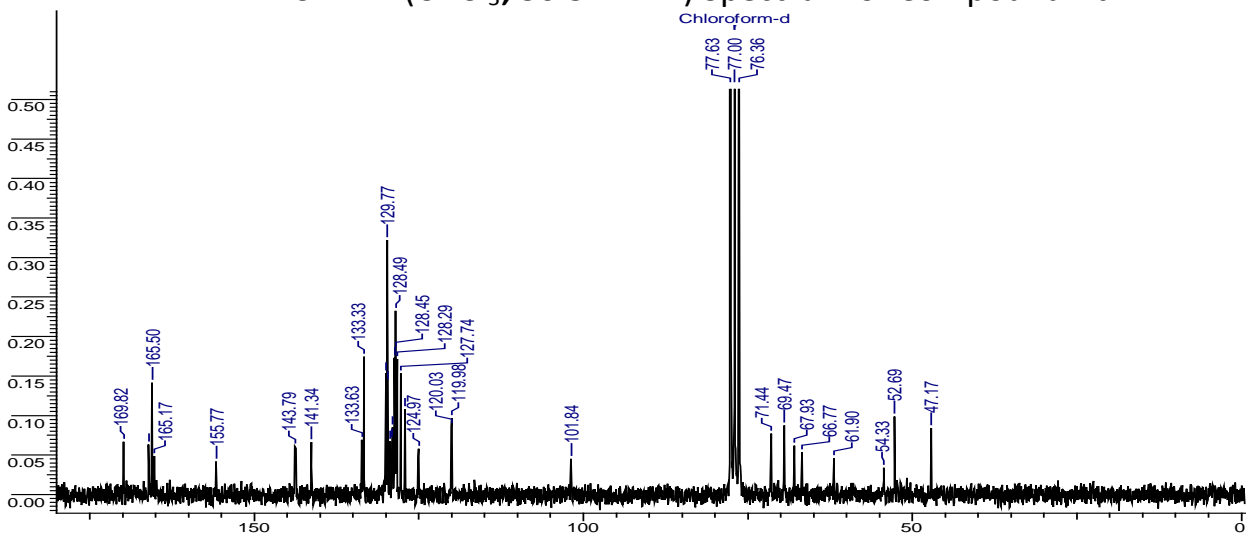

### DEPT NMR ( $\text{CDCl}_3$ , 50.32 MHz) Spectrum of Compound **4b**

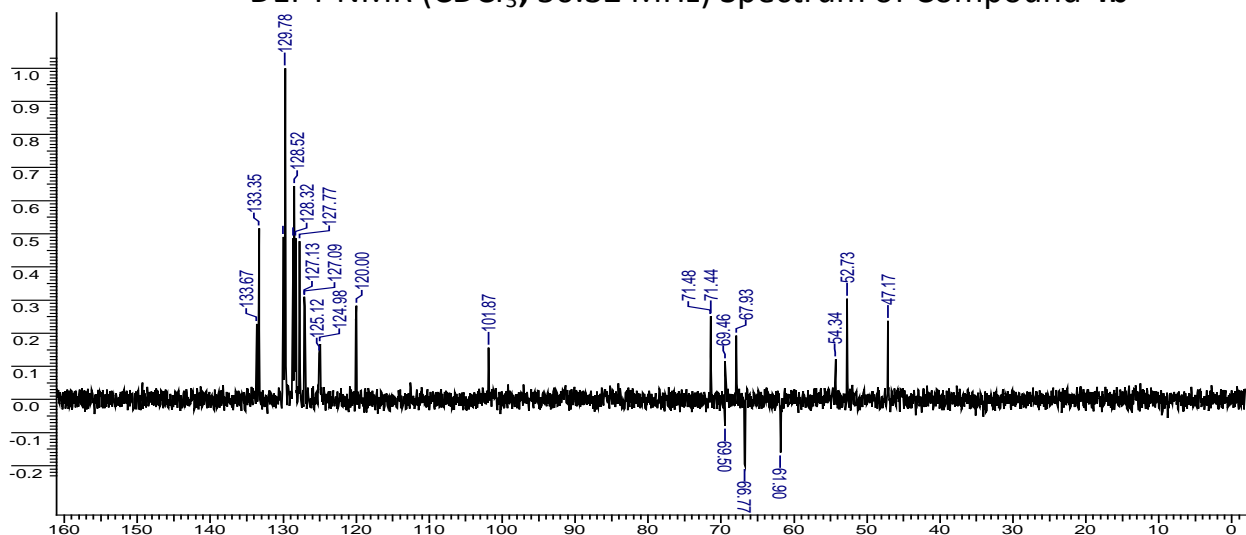

### $^1\text{H}$ NMR ( $\text{CDCl}_3$ , 200.13MHz) Spectrum of Compound 4c

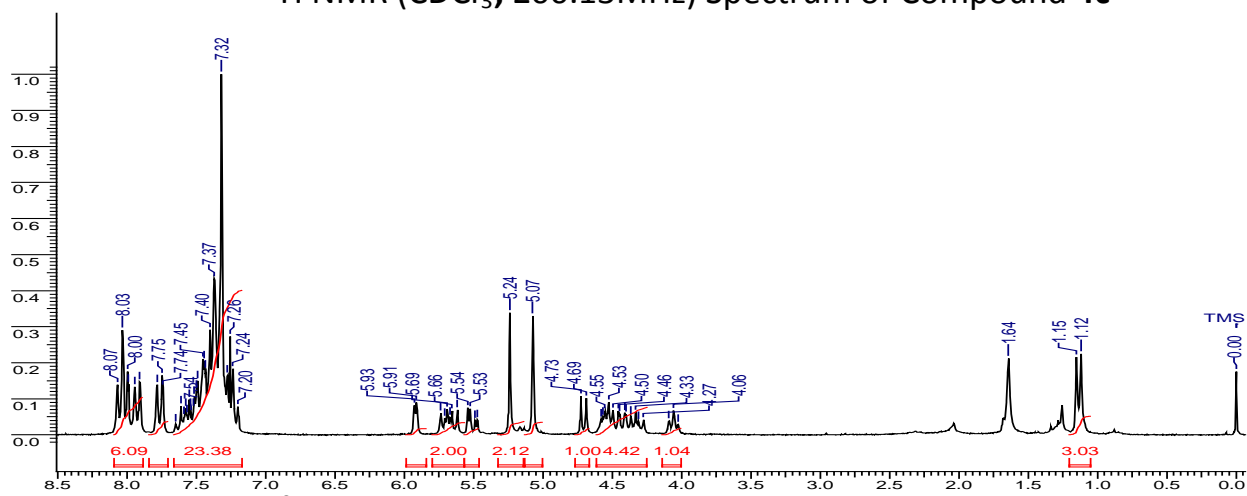

### $^{13}\text{C}$ NMR ( $\text{CDCl}_3$ , 50.32 MHz) Spectrum of Compound 4c

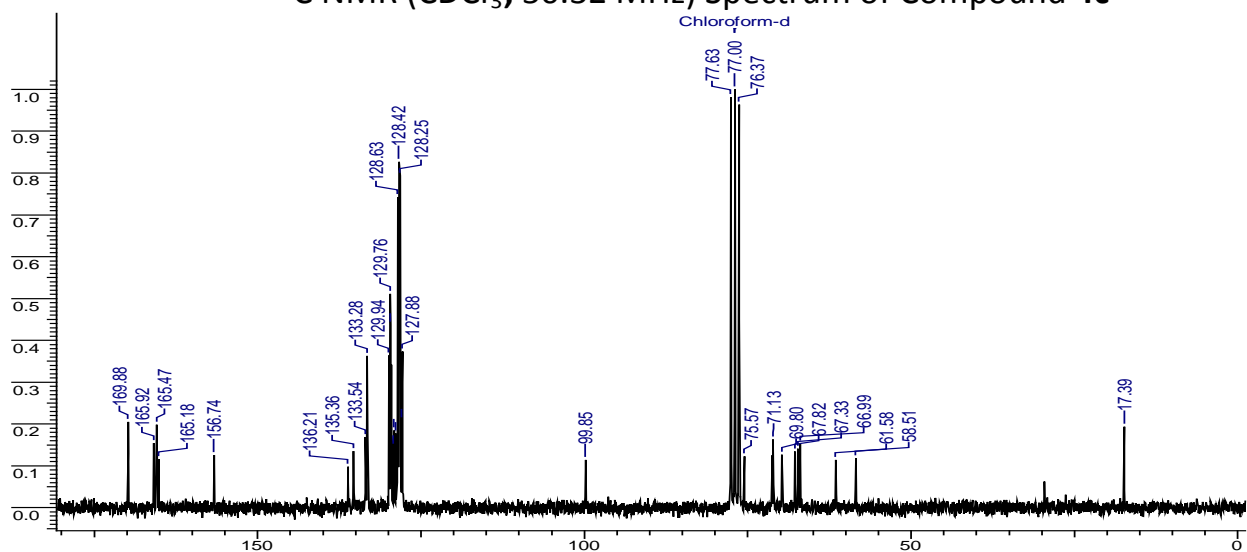

### DEPT NMR ( $\text{CDCl}_3$ , 50.32 MHz) Spectrum of Compound 4c

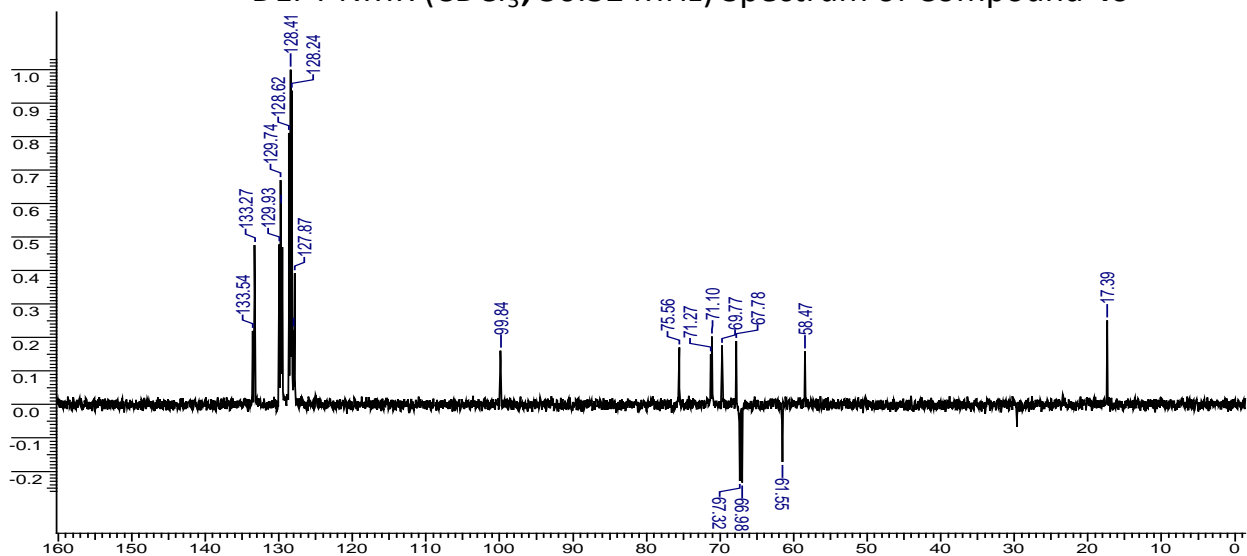

### $^1\text{H}$ NMR ( $\text{CDCl}_3$ , 200.13MHz) Spectrum of Compound 5a

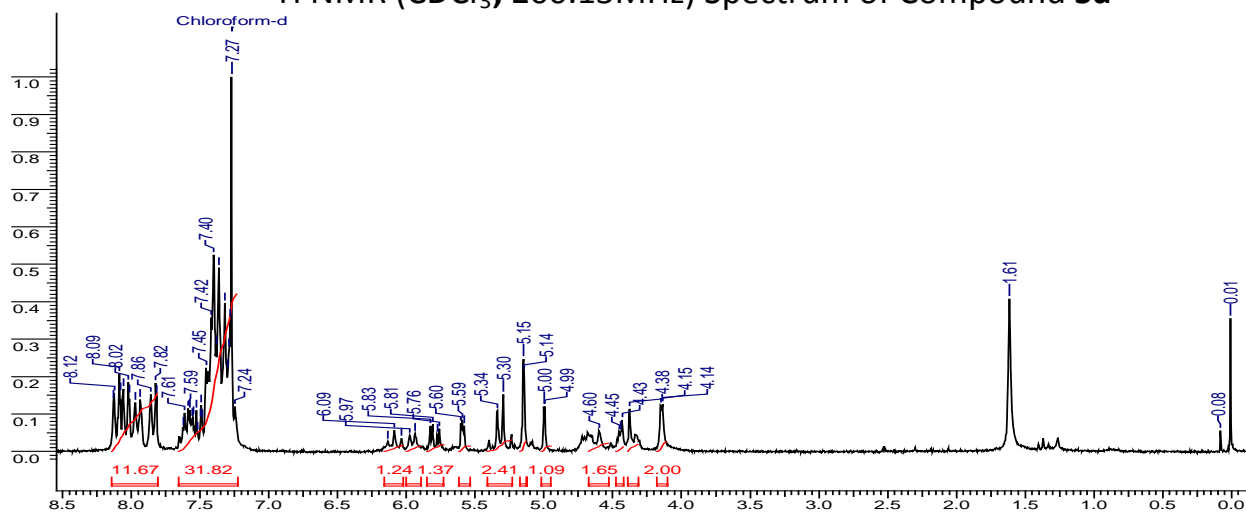

### $^{13}\text{C}$ NMR ( $\text{CDCl}_3$ , 50.32 MHz) Spectrum of Compound 5a

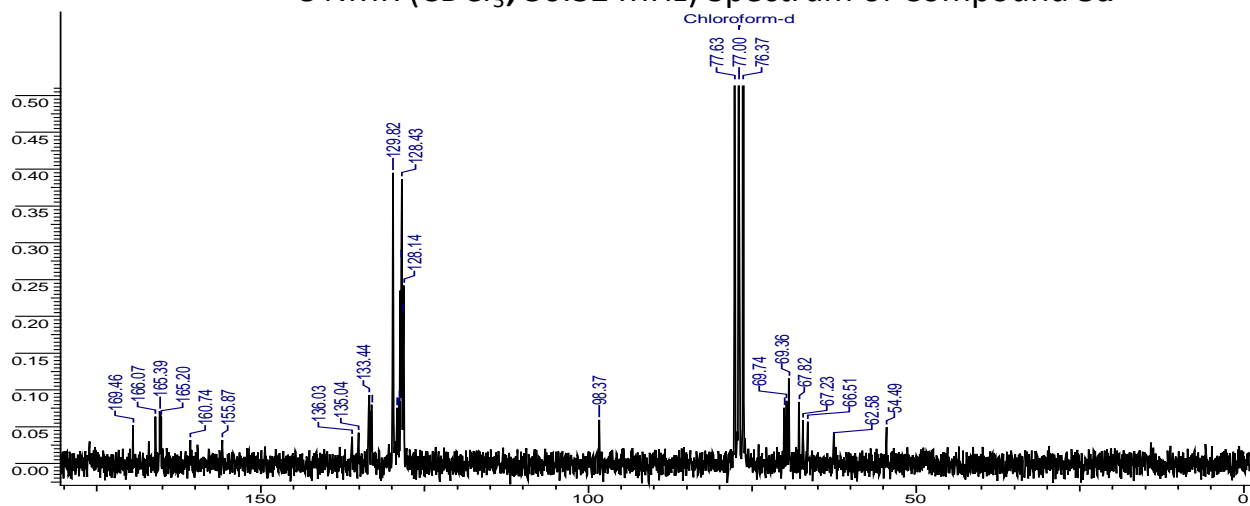

### DEPT NMR ( $\text{CDCl}_3$ , 50.32 MHz) Spectrum of Compound 5a

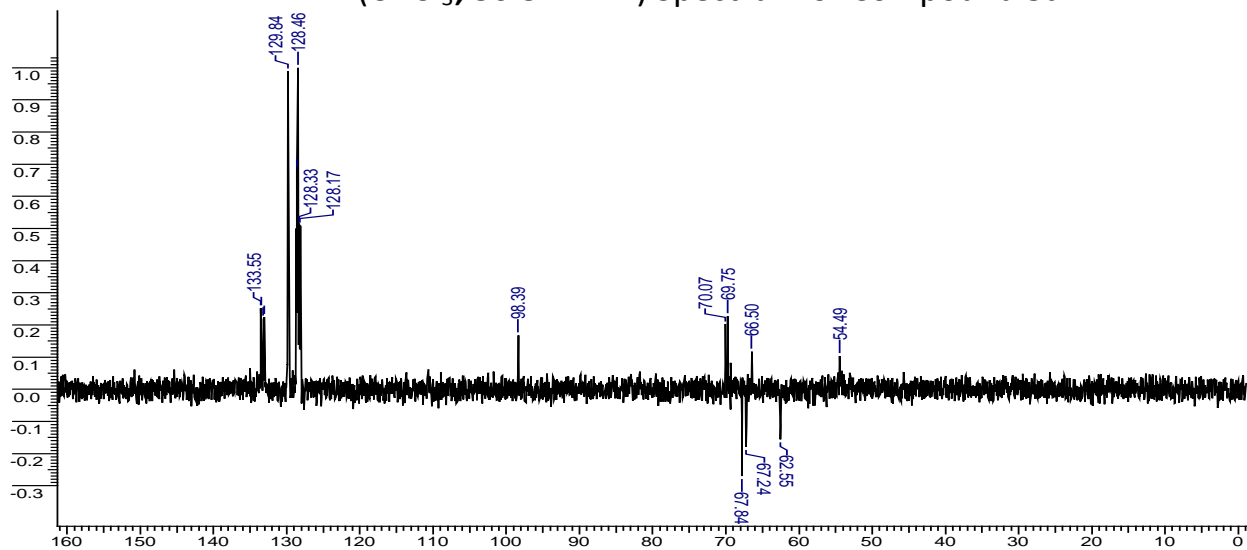

### $^1\text{H}$ NMR ( $\text{CDCl}_3$ , 200.13MHz) Spectrum of Compound **5b**

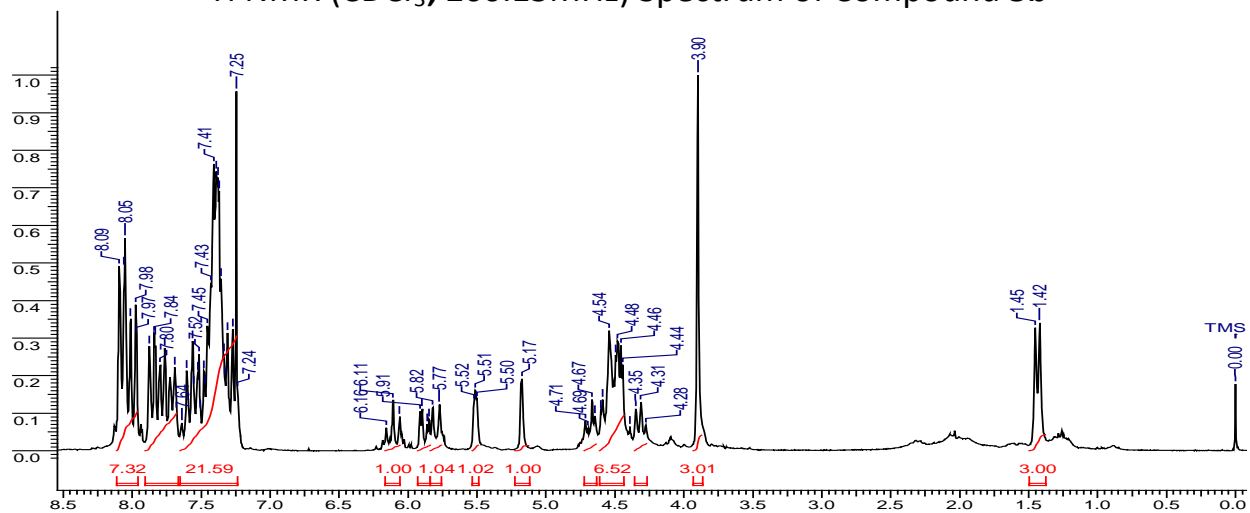

### $^{13}\text{C}$ NMR ( $\text{CDCl}_3$ , 50.32 MHz) Spectrum of Compound **5b**

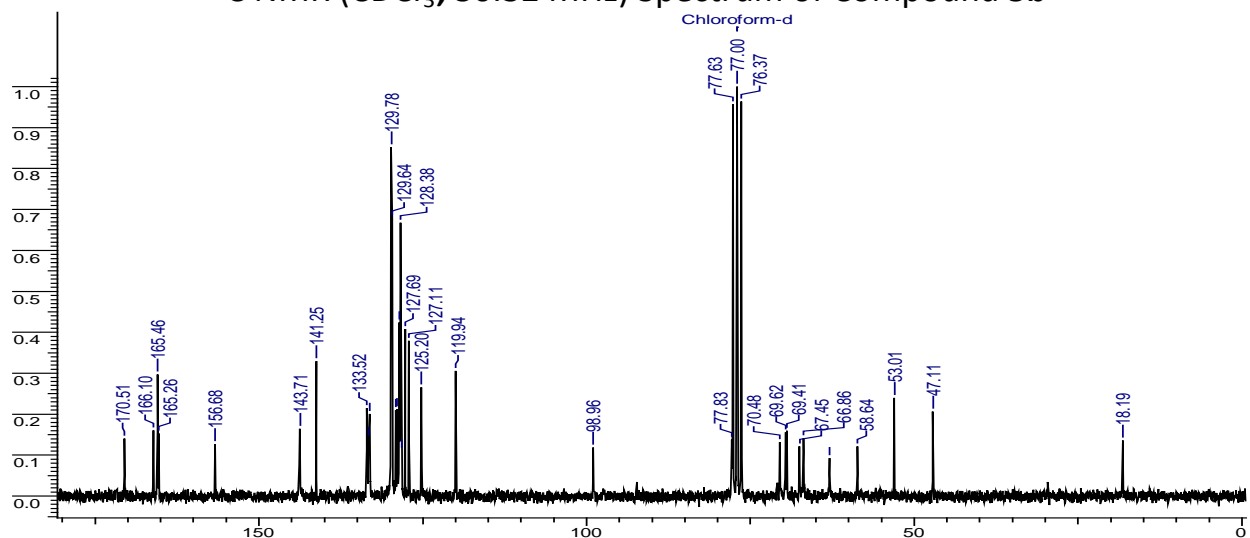

### DEPT NMR ( $\text{CDCl}_3$ , 50.32 MHz) Spectrum of Compound **5b**

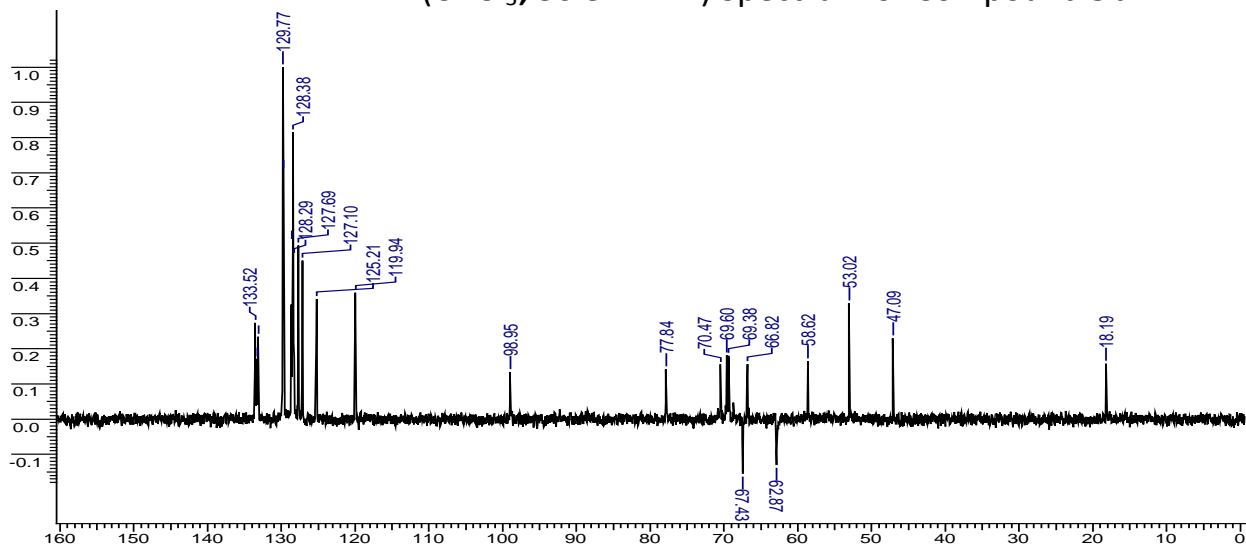

### $^1\text{H}$ NMR ( $\text{CDCl}_3$ , 200.13MHz) Spectrum of Compound 5c

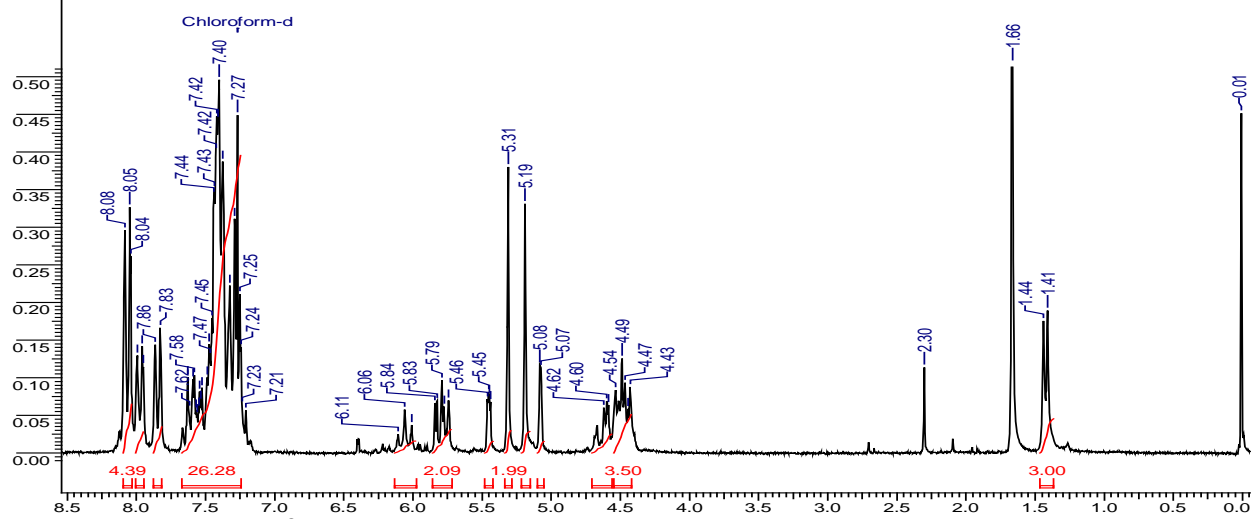

### $^{13}\text{C}$ NMR ( $\text{CDCl}_3$ , 50.32 MHz) Spectrum of Compound 5c

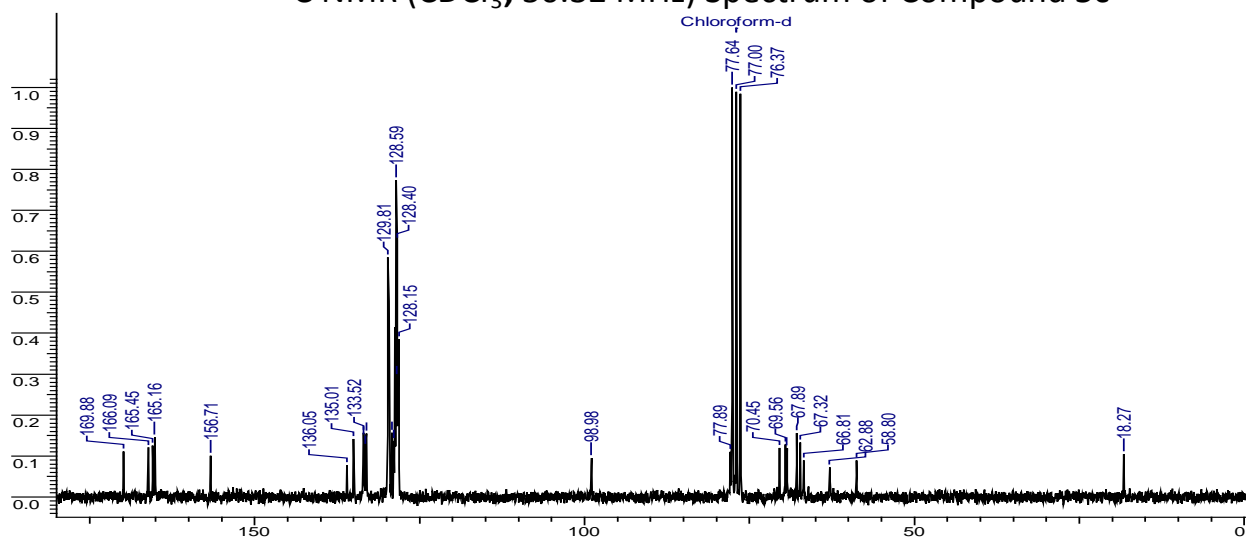

### DEPT NMR ( $\text{CDCl}_3$ , 50.32 MHz) Spectrum of Compound 5c

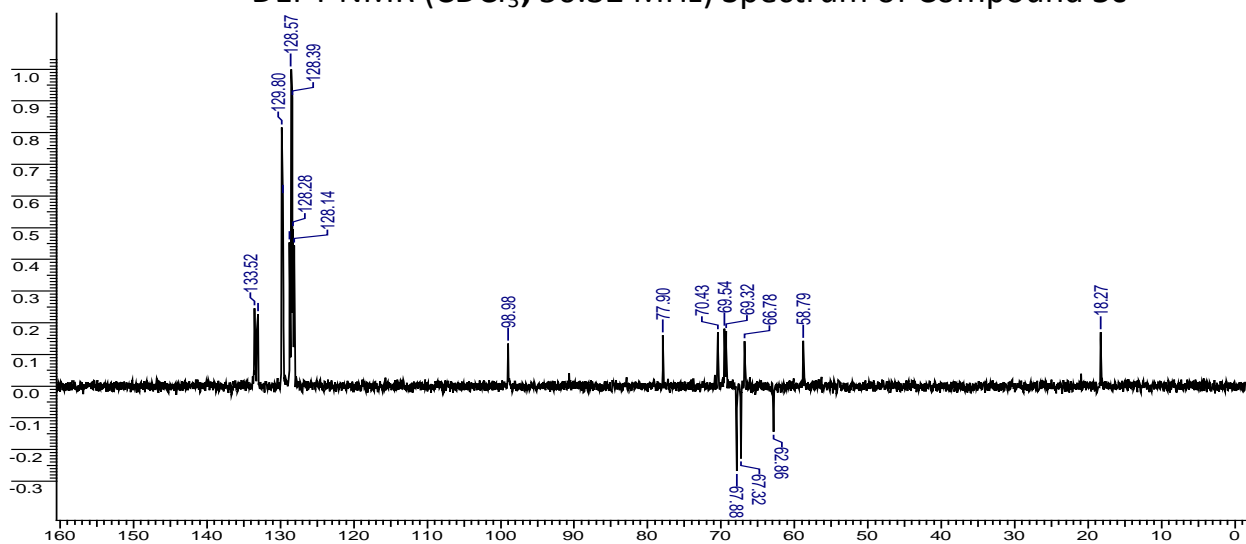

### $^1\text{H}$ NMR ( $\text{CDCl}_3$ , 200.13MHz) Spectrum of Compound 6a

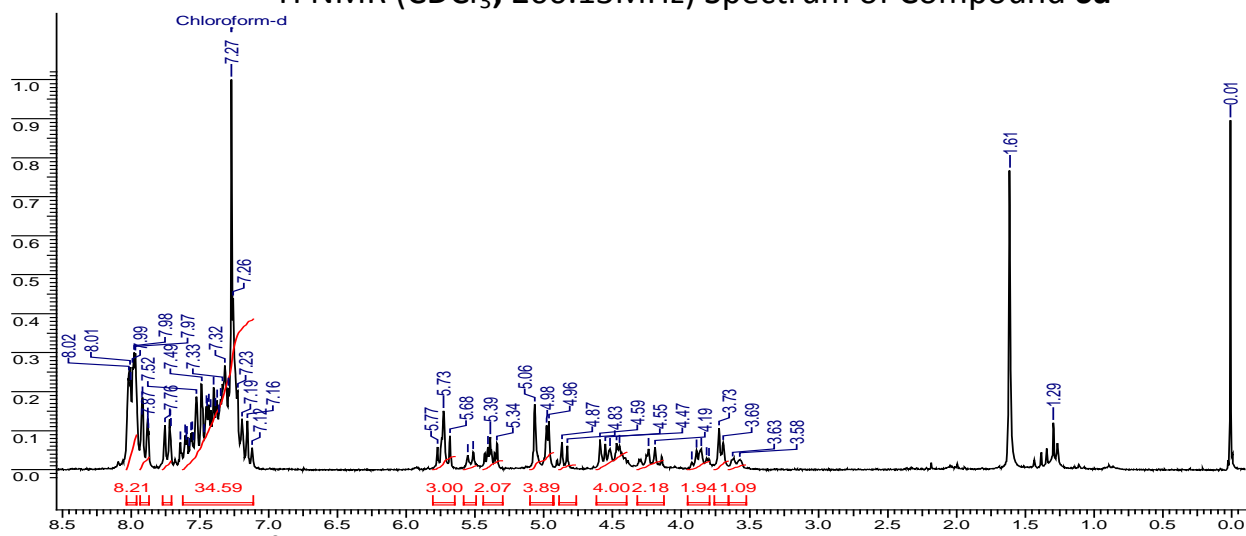

### $^1\text{H}$ NMR ( $\text{CDCl}_3$ , 500.13MHz) Spectrum of Compound **6b**

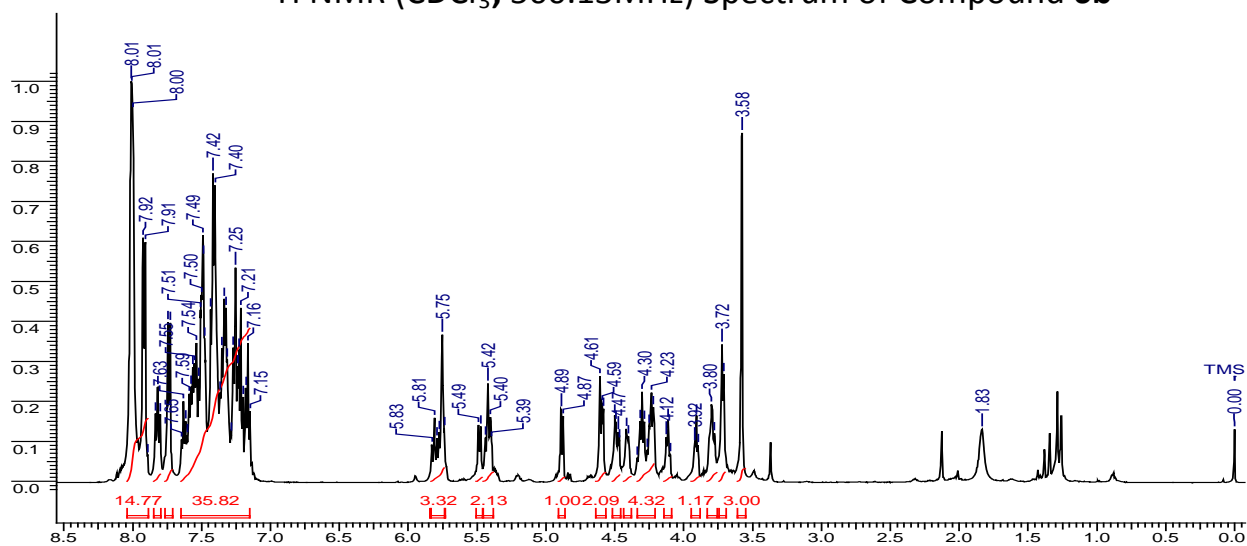

### $^{13}\text{C}$ NMR ( $\text{CDCl}_3$ , 125.76 MHz) Spectrum of Compound **6b**

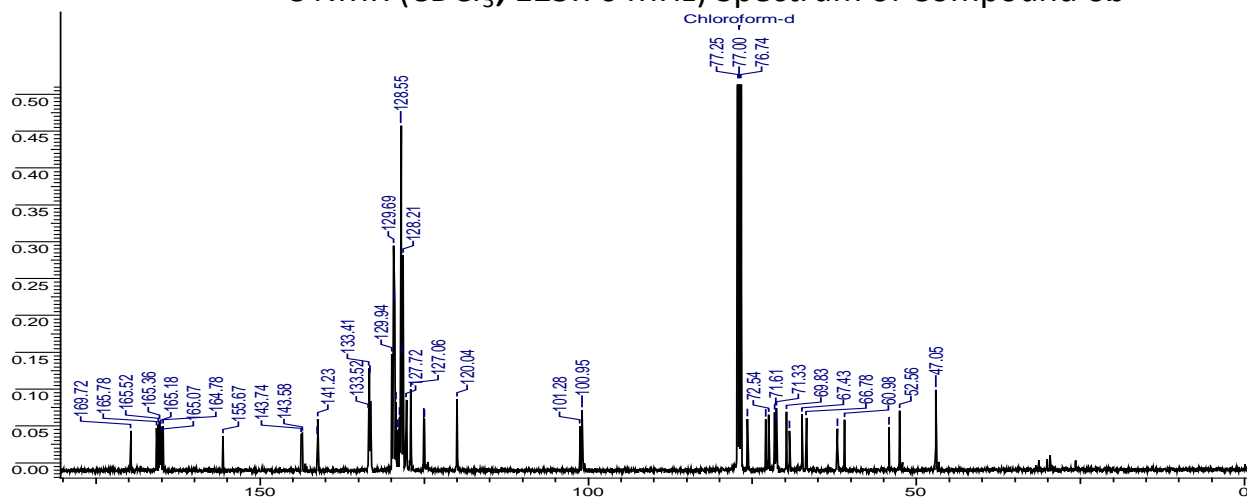

### DEPT NMR ( $\text{CDCl}_3$ , 125.76 MHz) Spectrum of Compound **6b**

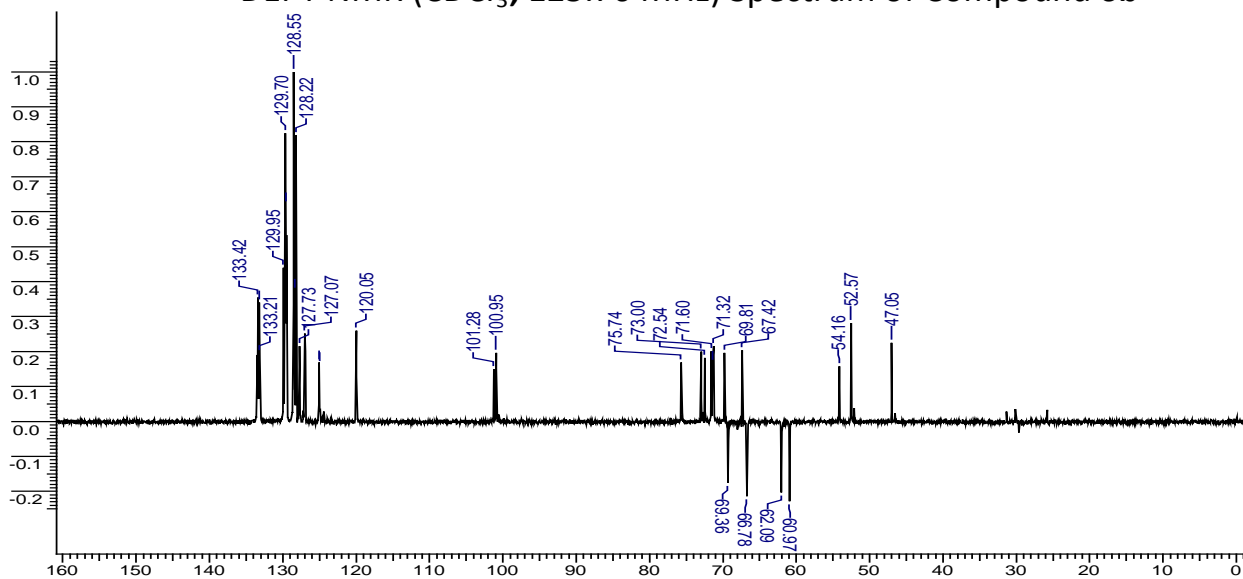

### $^1\text{H}$ NMR ( $\text{CDCl}_3$ , 400.13MHz) Spectrum of Compound **6c**

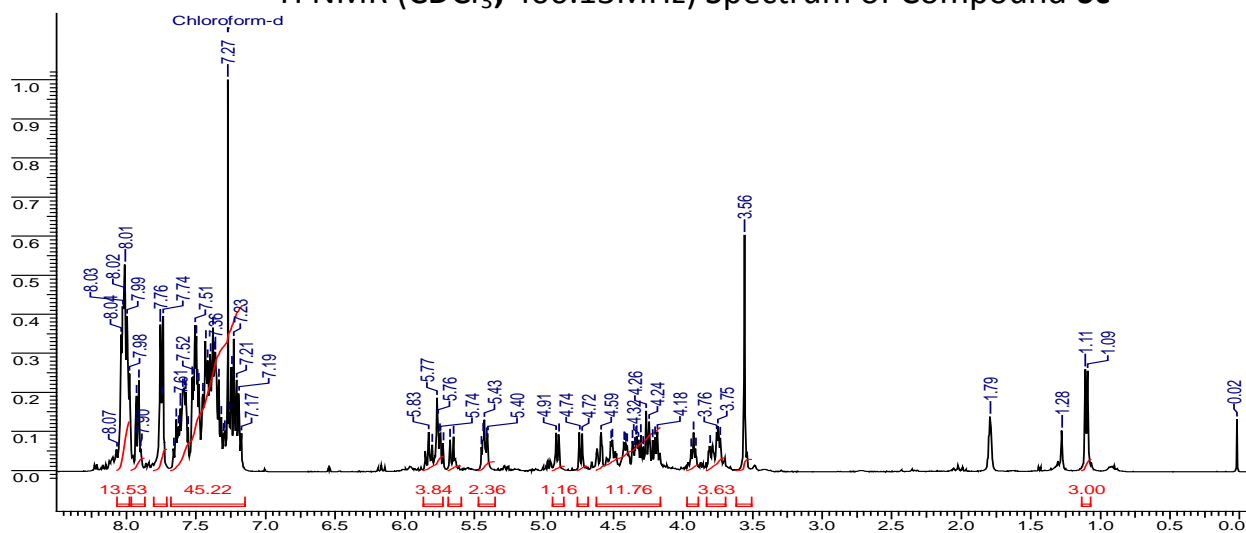

### $^{13}\text{C}$ NMR ( $\text{CDCl}_3$ , 100.61 MHz) Spectrum of Compound **6c**

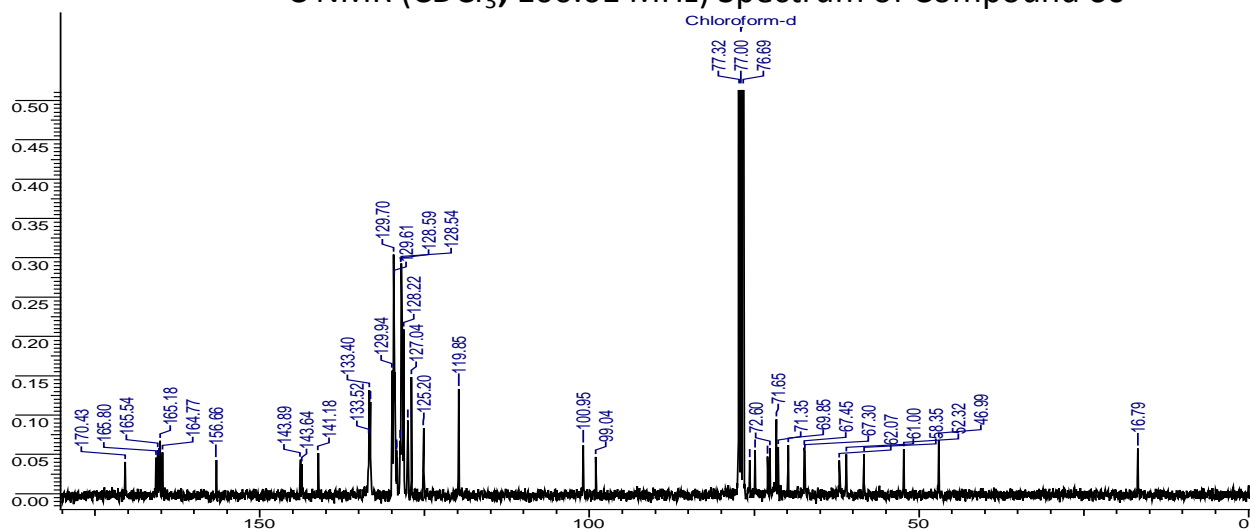

### DEPT NMR ( $\text{CDCl}_3$ , 100.61 MHz) Spectrum of Compound **6c**

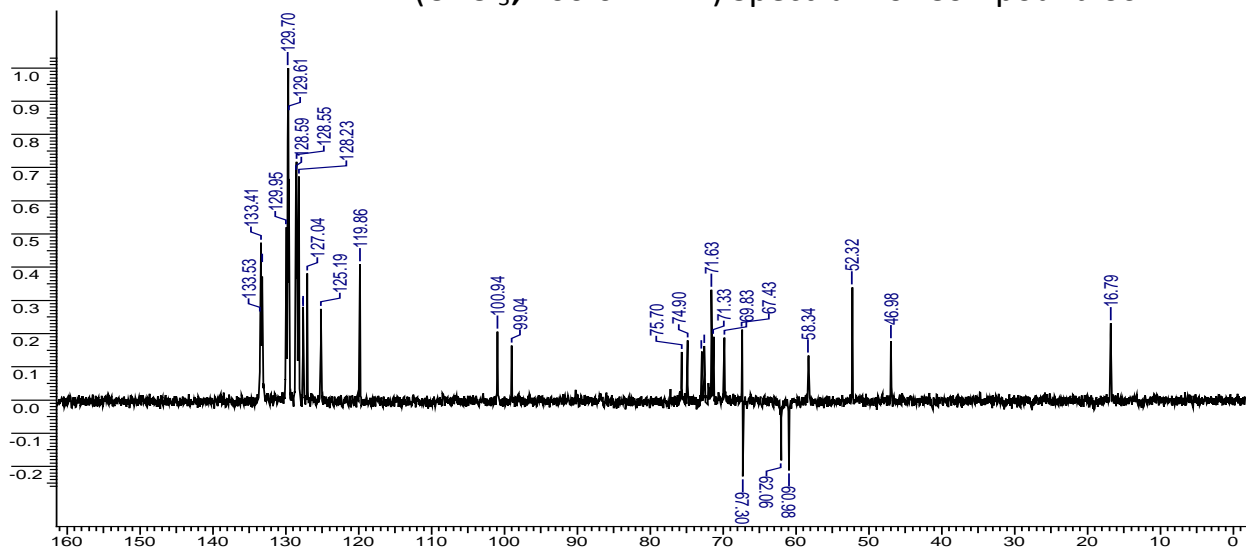



<sup>1</sup>H NMR (CDCl<sub>3</sub>, 500.13MHz) Spectrum of Compound 7a

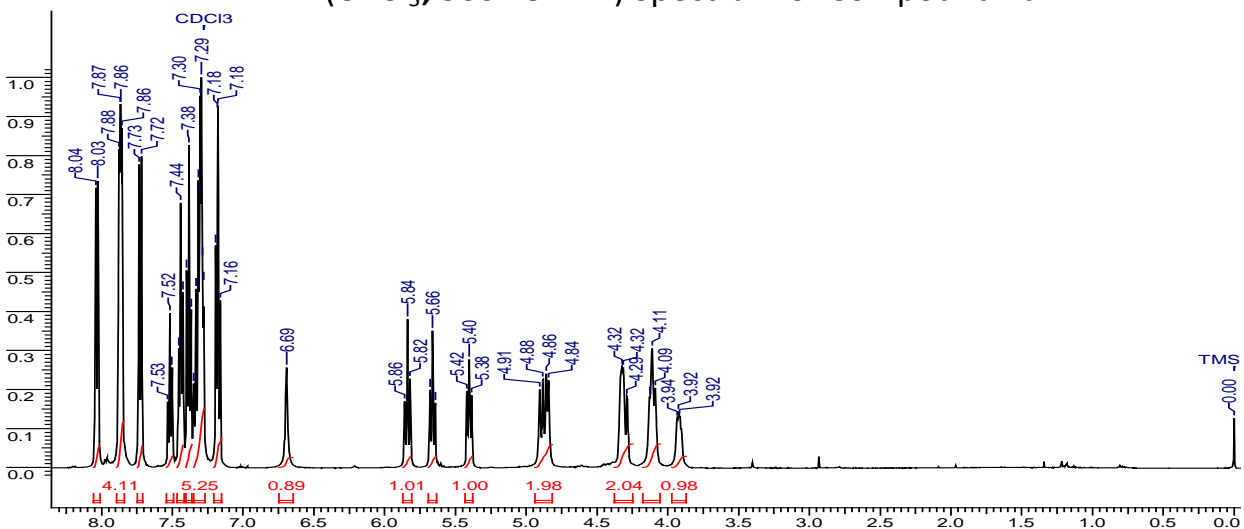

<sup>13</sup>C NMR (CDCl<sub>3</sub>, 125.76 MHz) Spectrum of Compound 7a

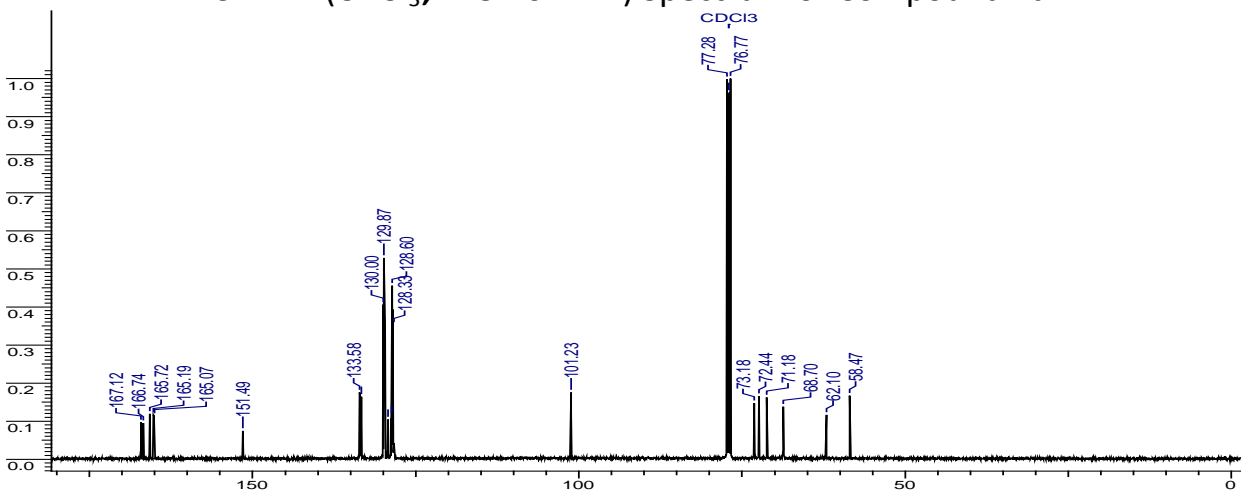

DEPT NMR (CDCl<sub>3</sub>, 125.76 MHz) Spectrum of Compound 7a

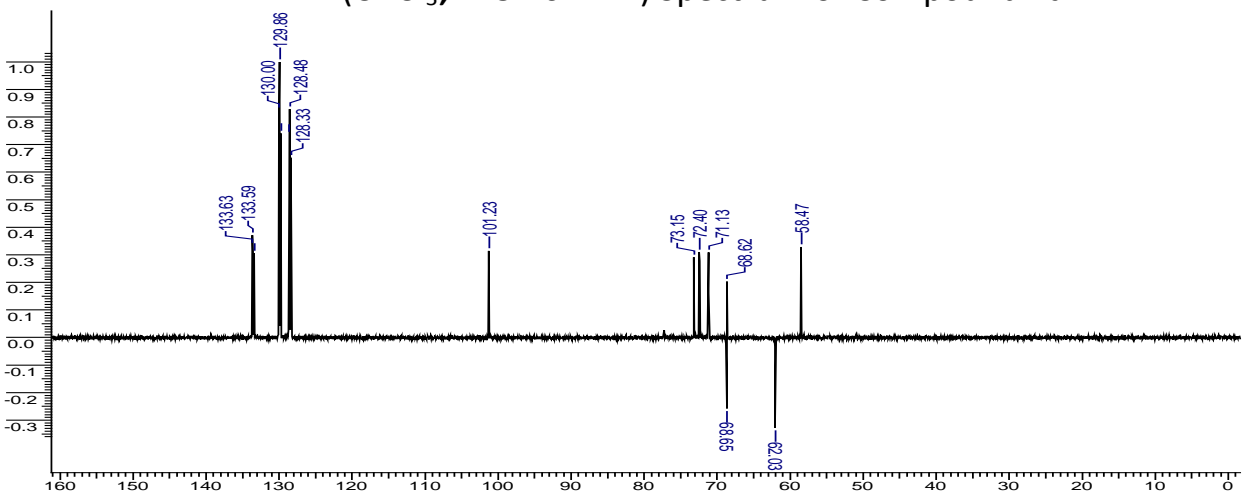

### $^1\text{H}$ NMR ( $\text{CDCl}_3$ , 400.13MHz) Spectrum of Compound A

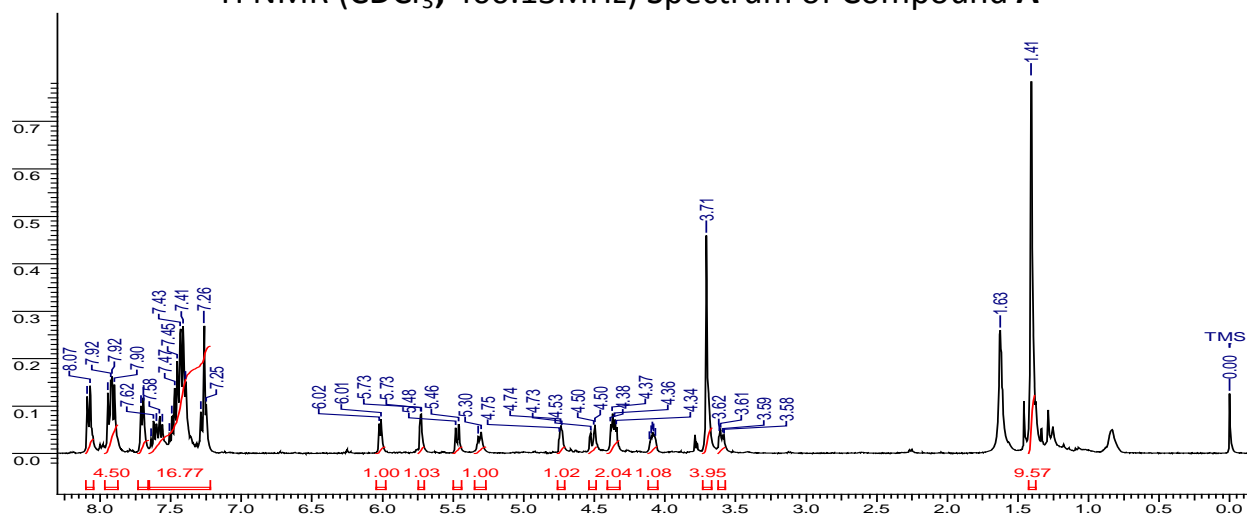

### $^{13}\text{C}$ NMR ( $\text{CDCl}_3$ , 100.61 MHz) Spectrum of Compound A

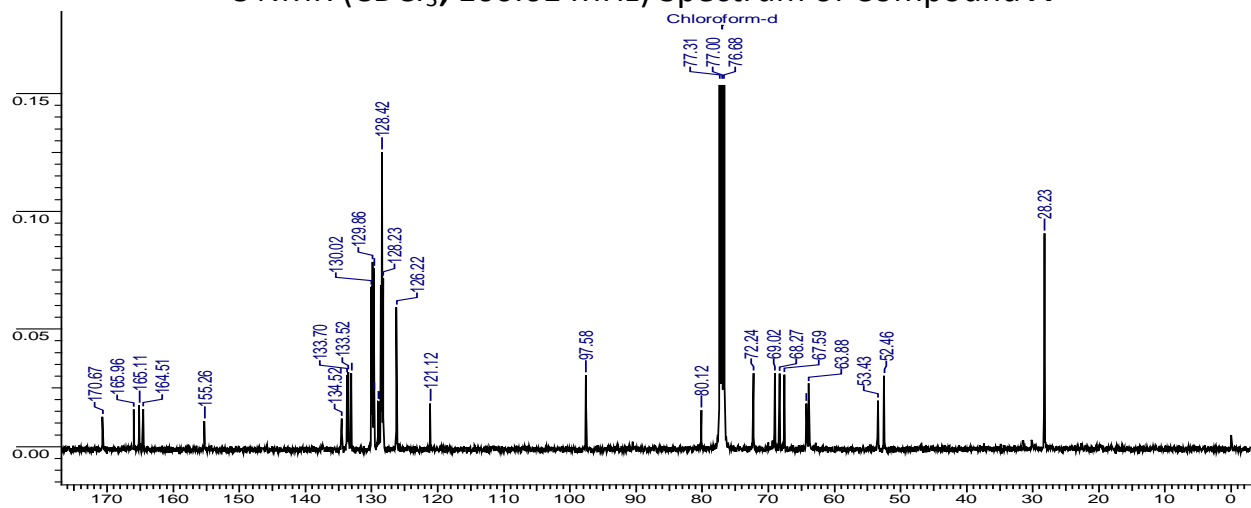

### DEPT NMR ( $\text{CDCl}_3$ , 100.61 MHz) Spectrum of Compound A

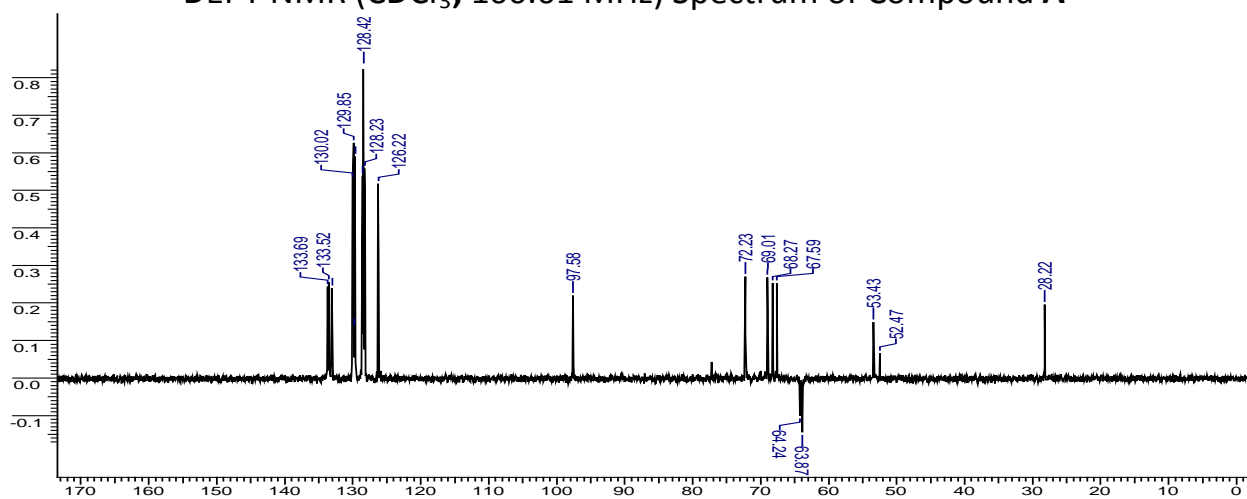

### $^1\text{H}$ NMR ( $\text{CDCl}_3$ , 400.13MHz) Spectrum of Compound **8**

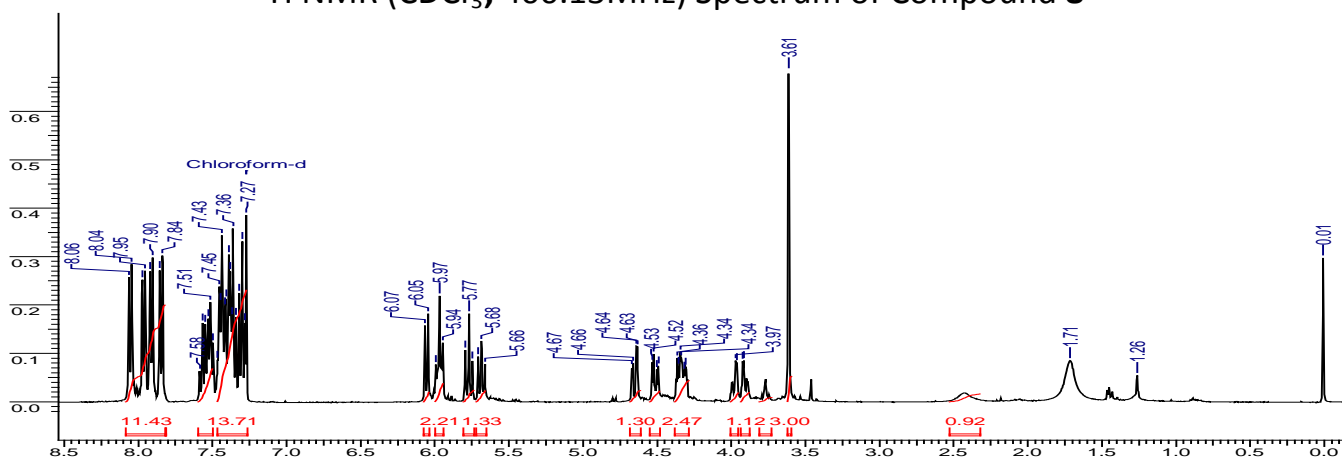

### $^{13}\text{C}$ NMR ( $\text{CDCl}_3$ , 100.61 MHz) Spectrum of Compound **8**

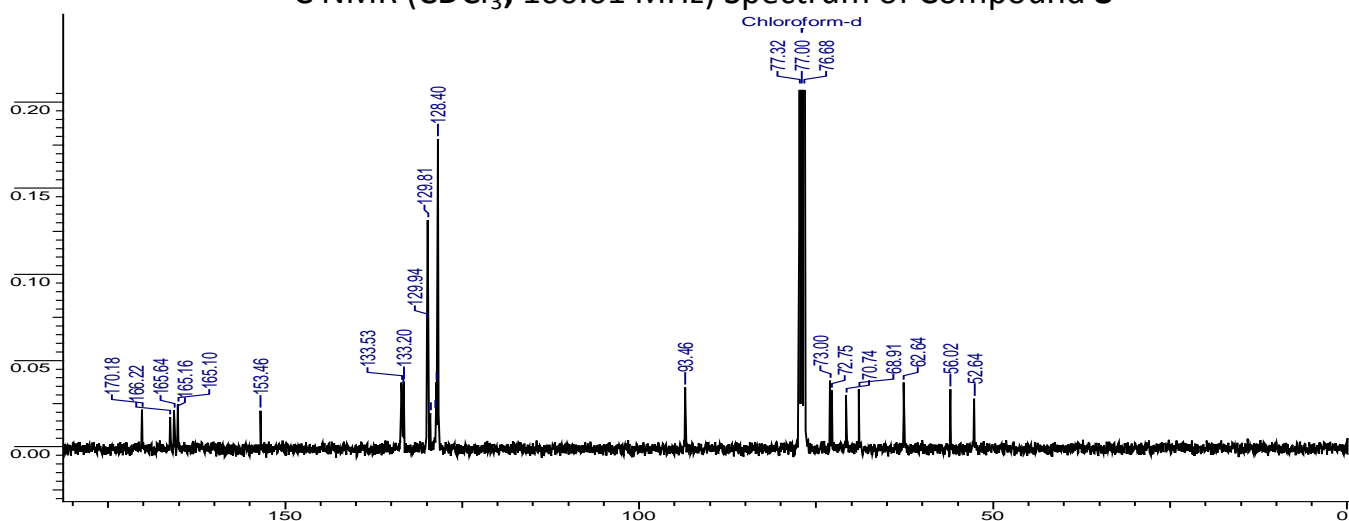

### DEPT NMR ( $\text{CDCl}_3$ , 100.61 MHz) Spectrum of Compound **8**

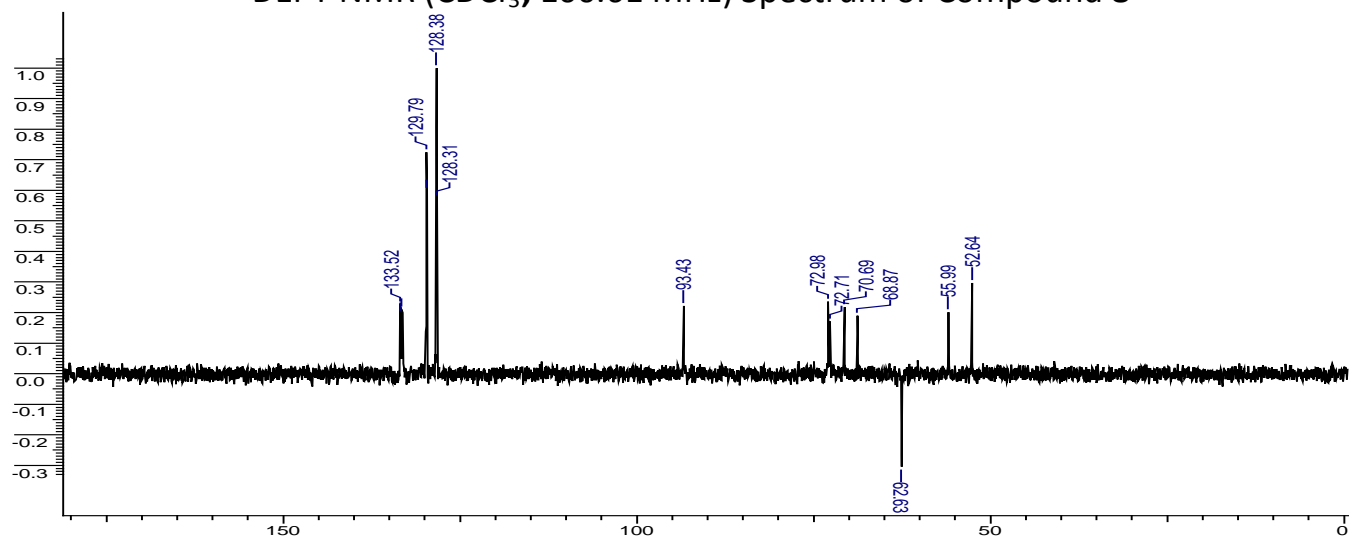

### $^1\text{H}$ NMR ( $\text{CDCl}_3$ , 200.12MHz) Spectrum of Compound **10a**

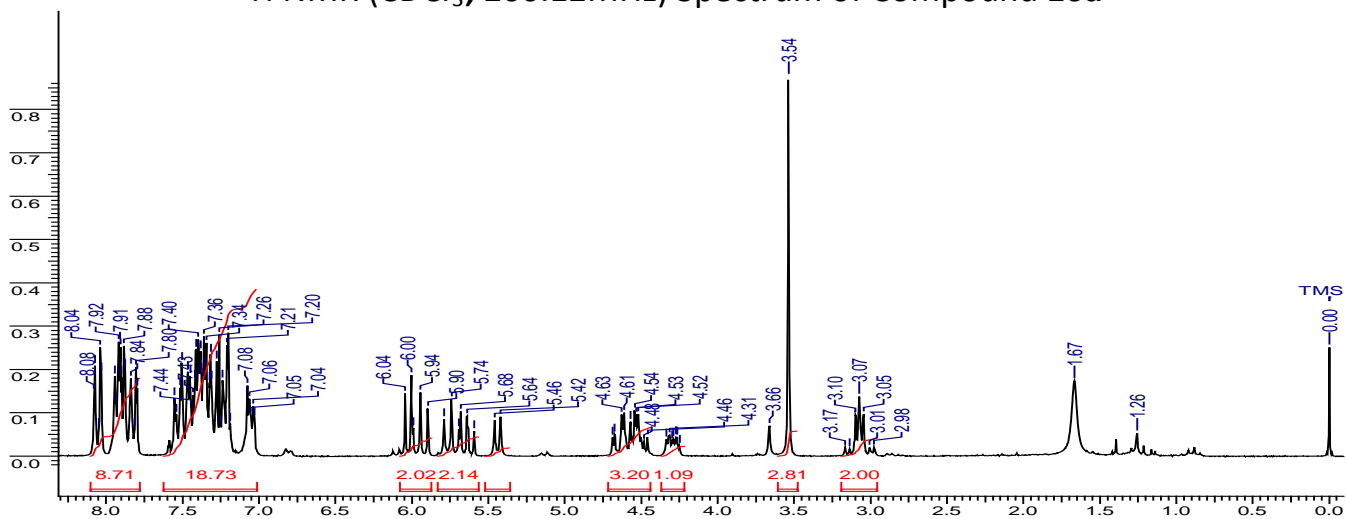

### $^{13}\text{C}$ NMR ( $\text{CDCl}_3$ , 50.32 MHz) Spectrum of Compound **10a**

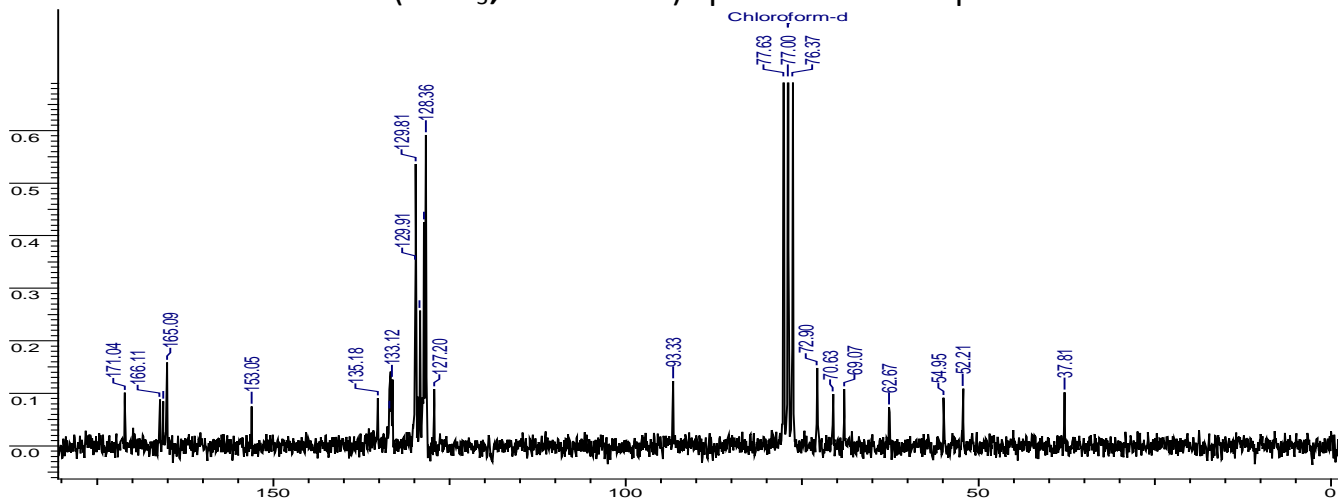

### DEPT NMR ( $\text{CDCl}_3$ , 50.32MHz) Spectrum of Compound **10a**

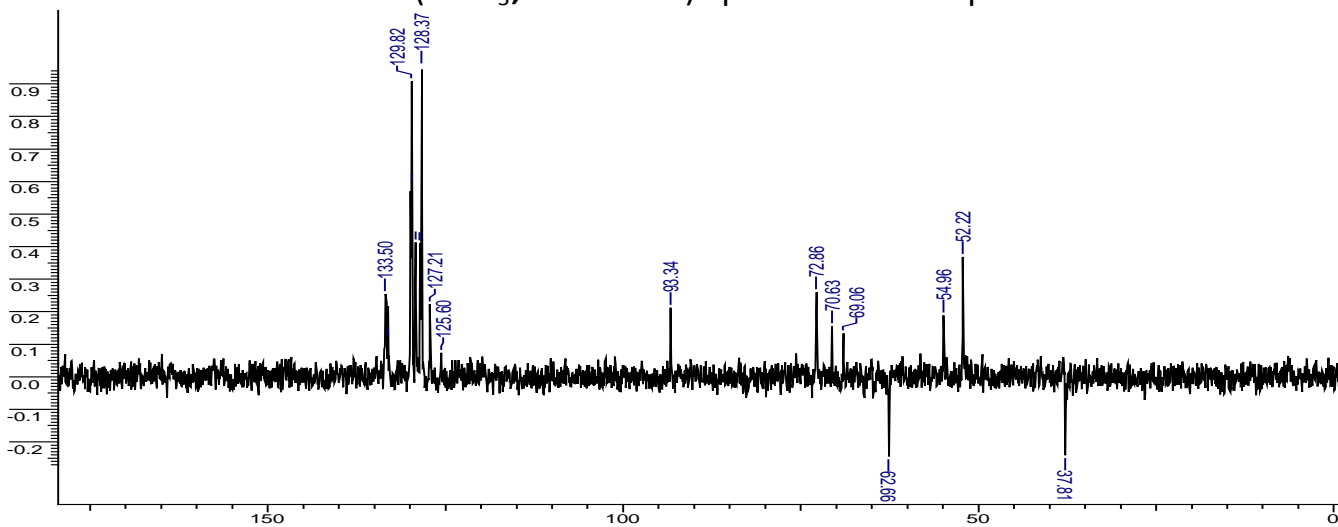

### $^1\text{H}$ NMR ( $\text{CDCl}_3$ , 200.12MHz) Spectrum of Compound **10b**

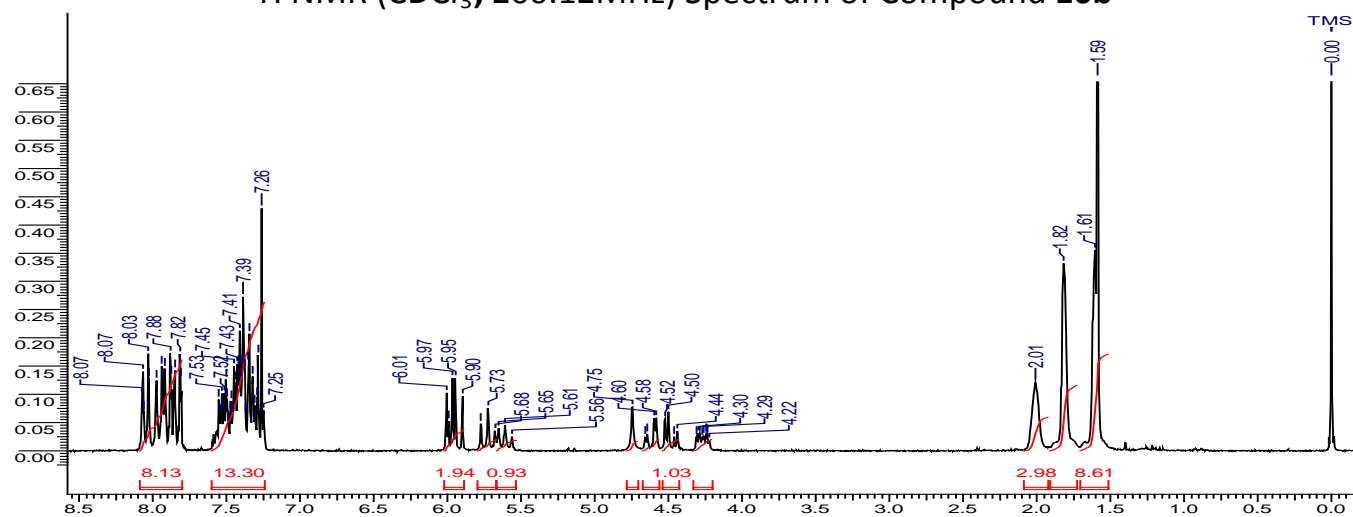

### $^{13}\text{C}$ NMR ( $\text{CDCl}_3$ , 50.32 MHz) Spectrum of Compound **10b**

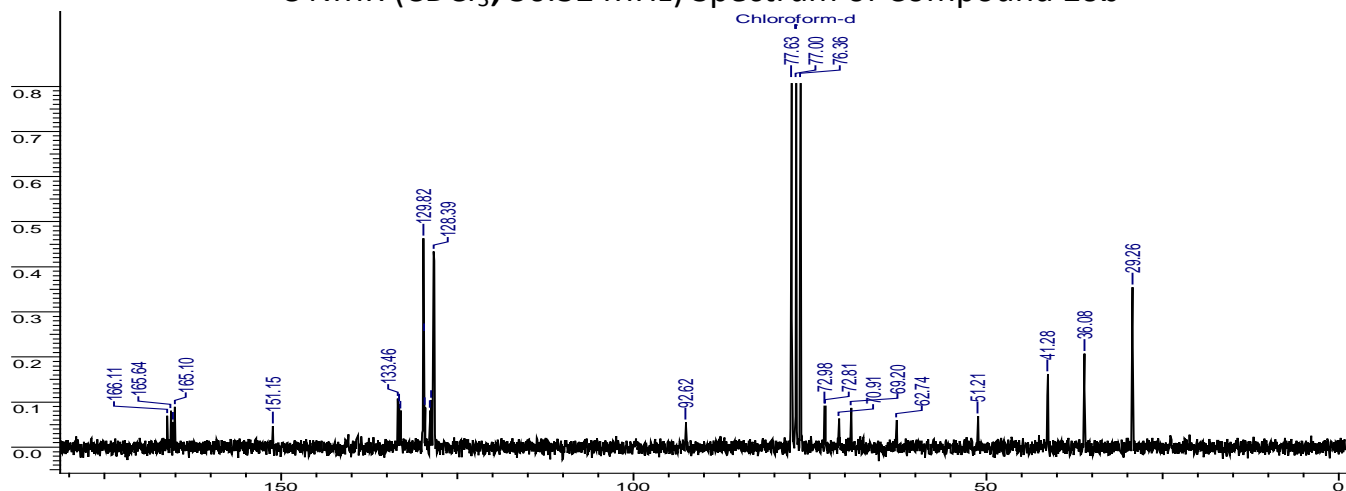

### DEPT NMR ( $\text{CDCl}_3$ , 50.32 MHz) Spectrum of Compound **10b**

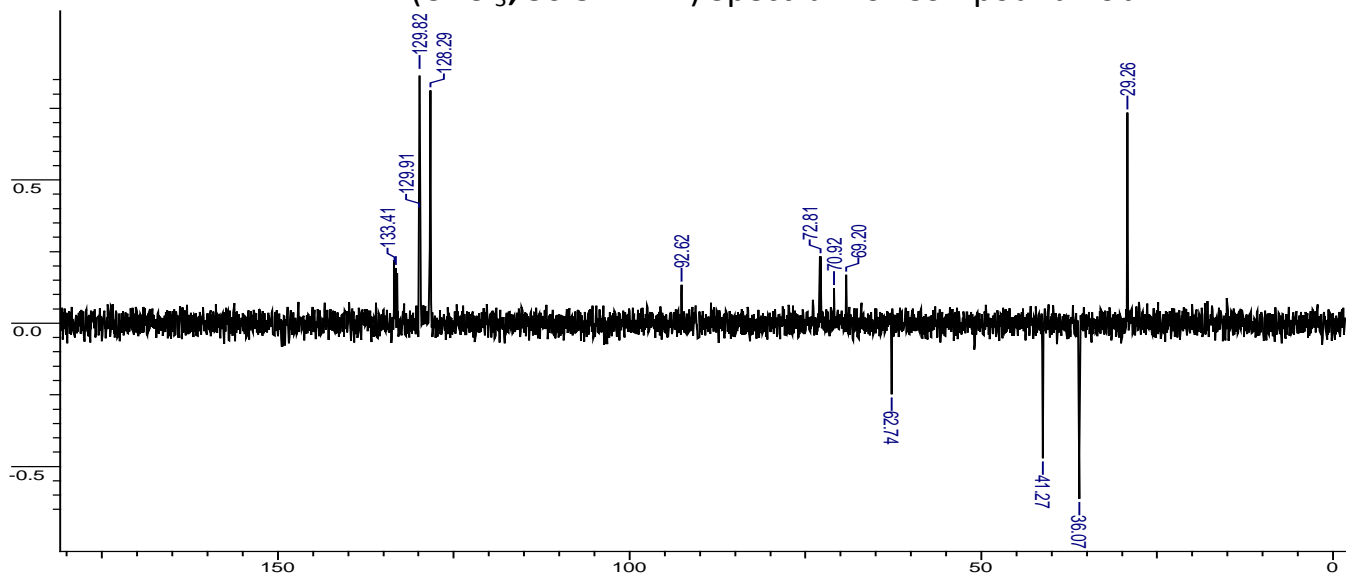

$^1\text{H}$  NMR ( $\text{CDCl}_3$ , 200.12MHz) Spectrum of Compound **10c**

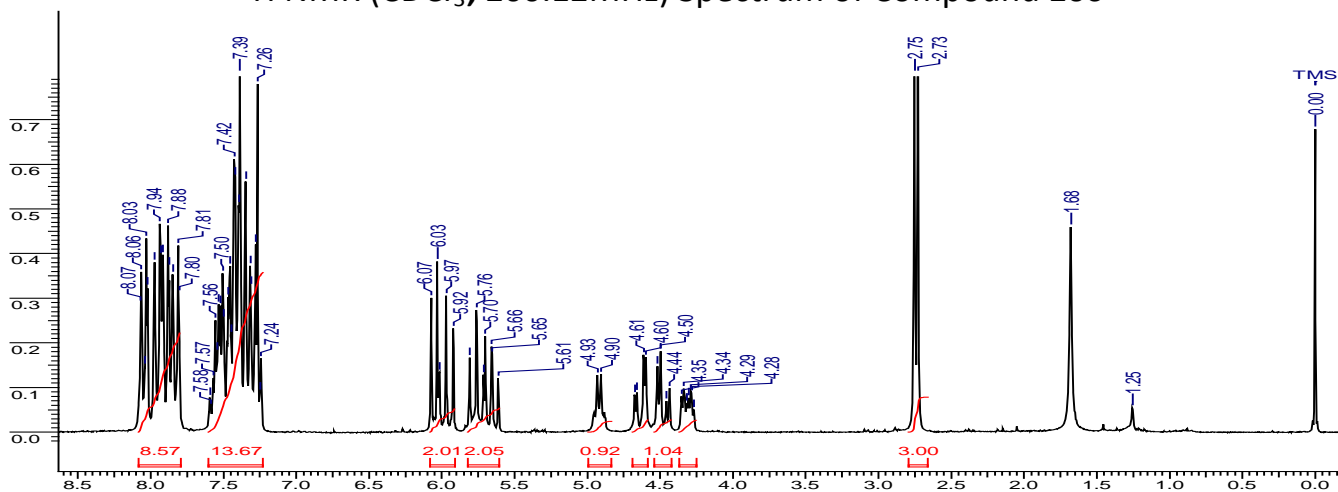

$^{13}\text{C}$  NMR ( $\text{CDCl}_3$ , 50.32 MHz) Spectrum of Compound **10c**

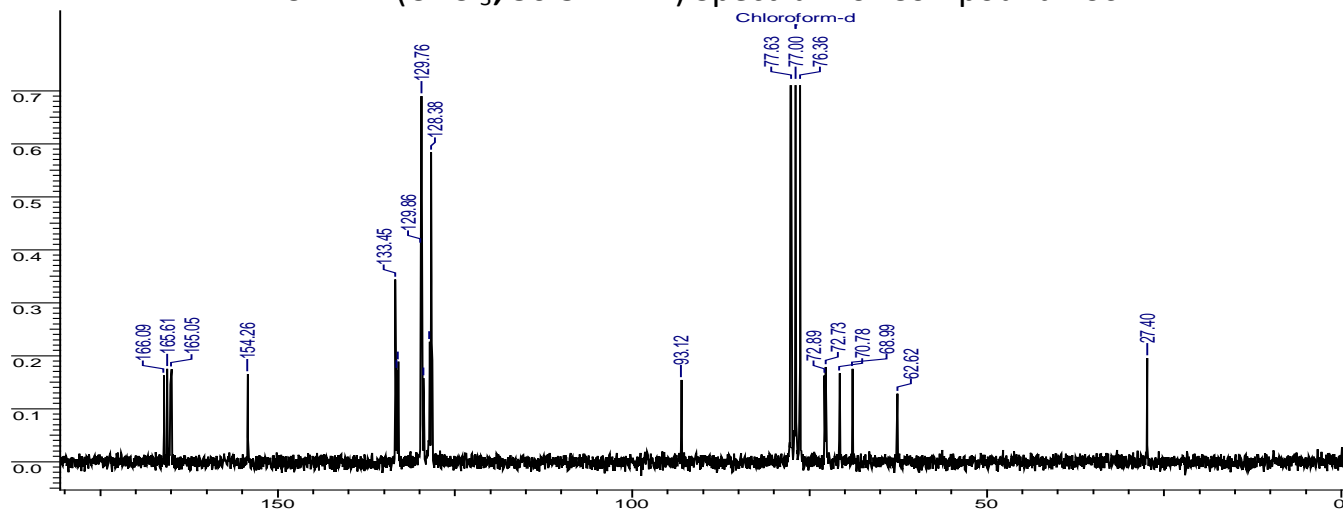

DEPT NMR ( $\text{CDCl}_3$ , 50.32 MHz) Spectrum of Compound **10c**

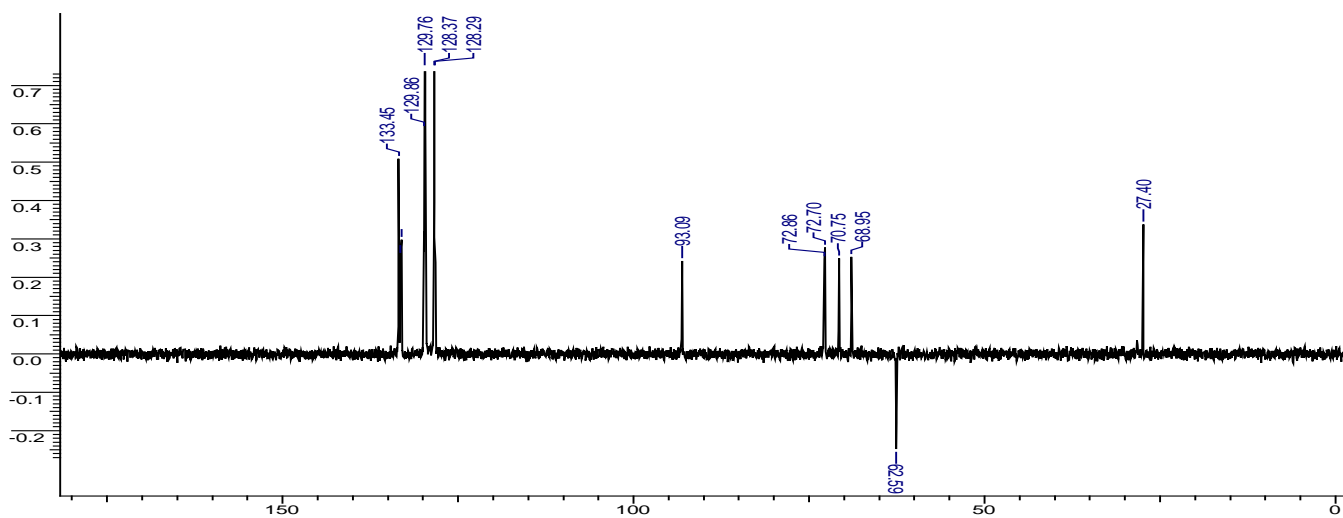

### $^1\text{H}$ NMR ( $\text{CDCl}_3$ , 200.12MHz) Spectrum of Compound **10d**

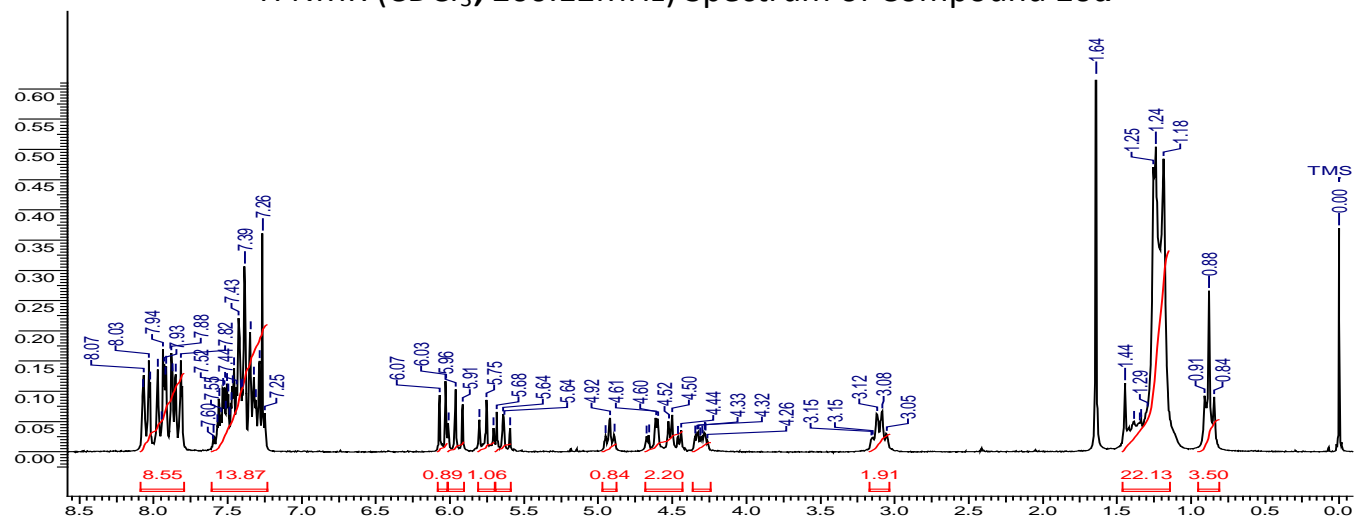

### $^{13}\text{C}$ NMR ( $\text{CDCl}_3$ , 50.32 MHz) Spectrum of Compound **10d**

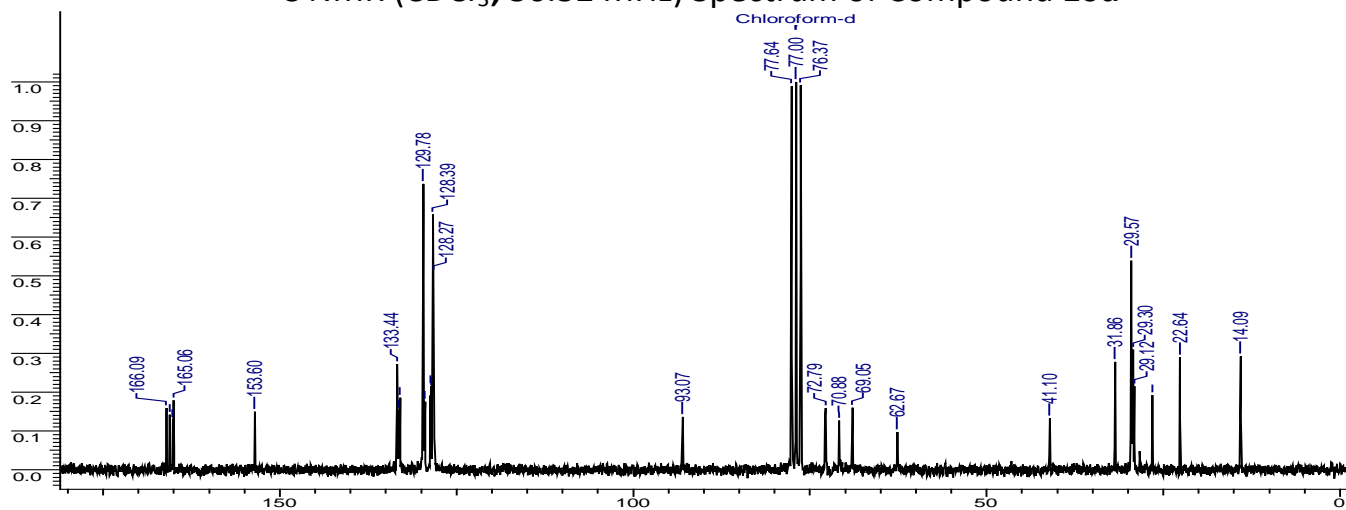

### DEPT NMR ( $\text{CDCl}_3$ , 50.32 MHz) Spectrum of Compound **10d**

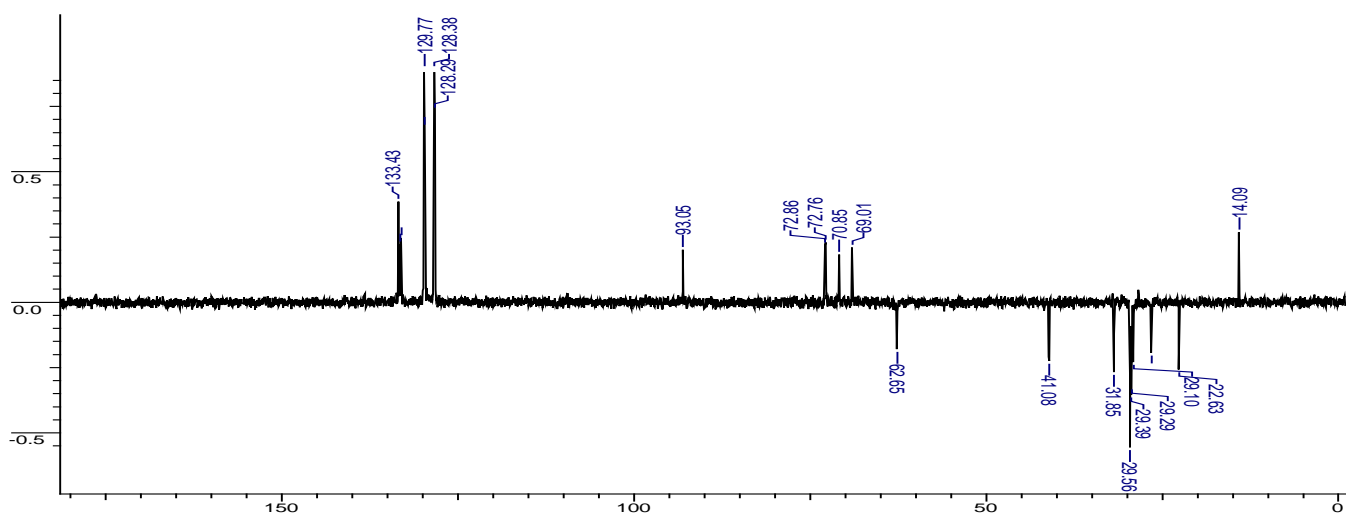

$^1\text{H}$  NMR ( $\text{CDCl}_3$ , 200.12MHz) Spectrum of Compound **10e**

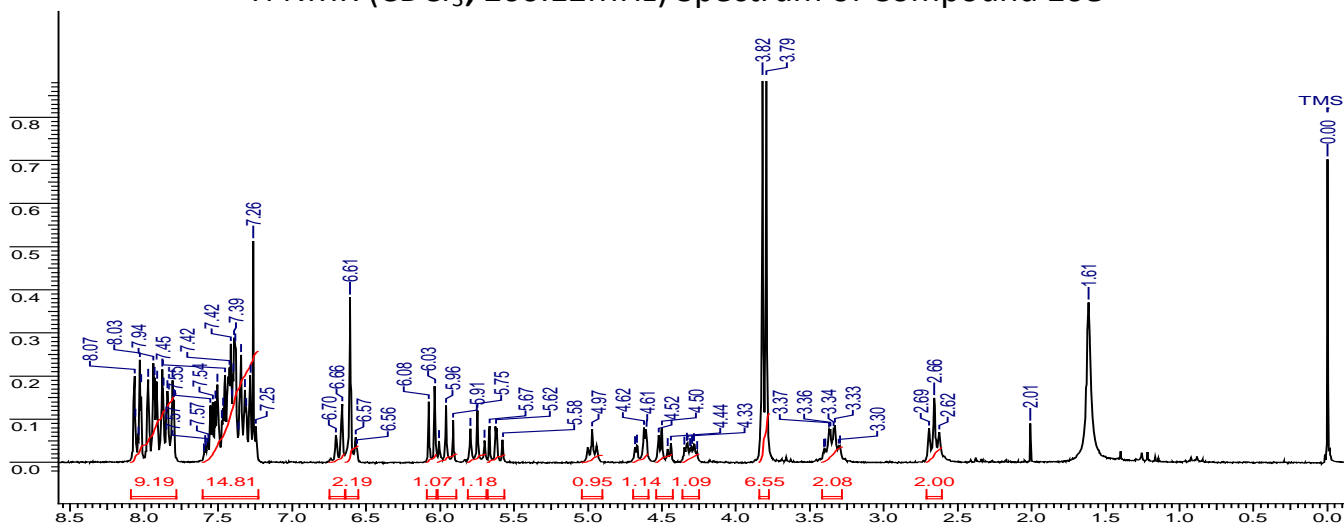

$^{13}\text{C}$  NMR ( $\text{CDCl}_3$ , 50.32 MHz) Spectrum of Compound **10e**

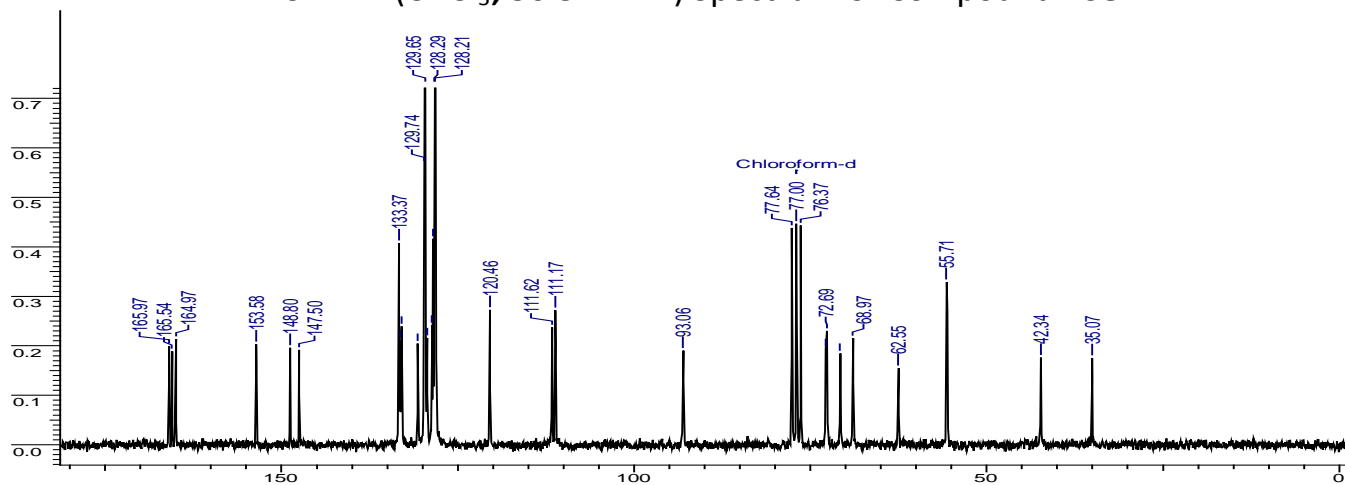

DEPT NMR ( $\text{CDCl}_3$ , 50.32 MHz) Spectrum of Compound **10e**

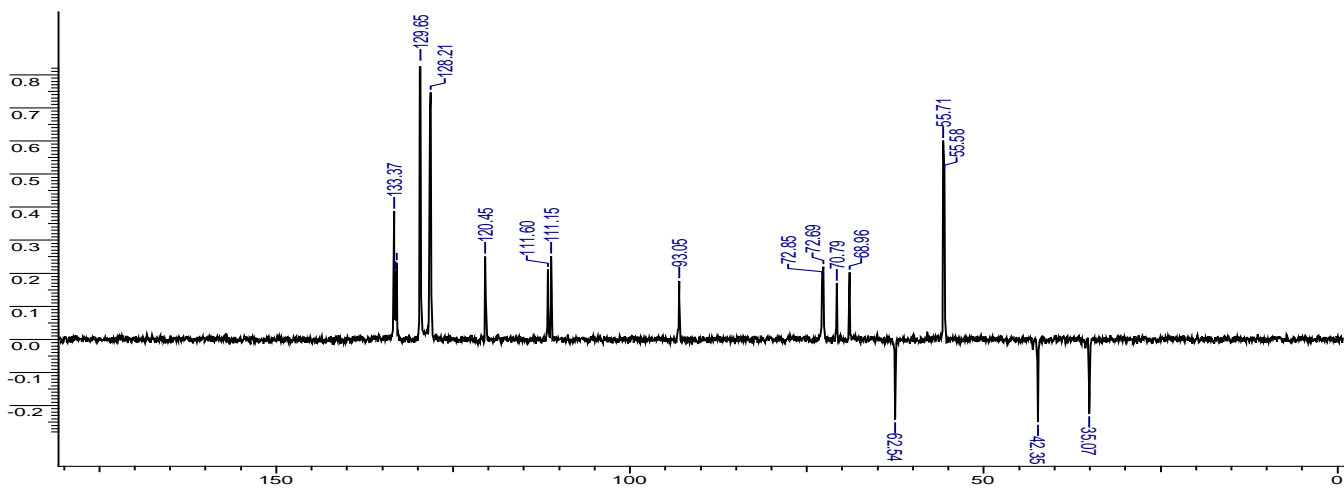



### $^1\text{H}$ NMR ( $\text{CDCl}_3$ , 200.12MHz) Spectrum of Compound **10f**

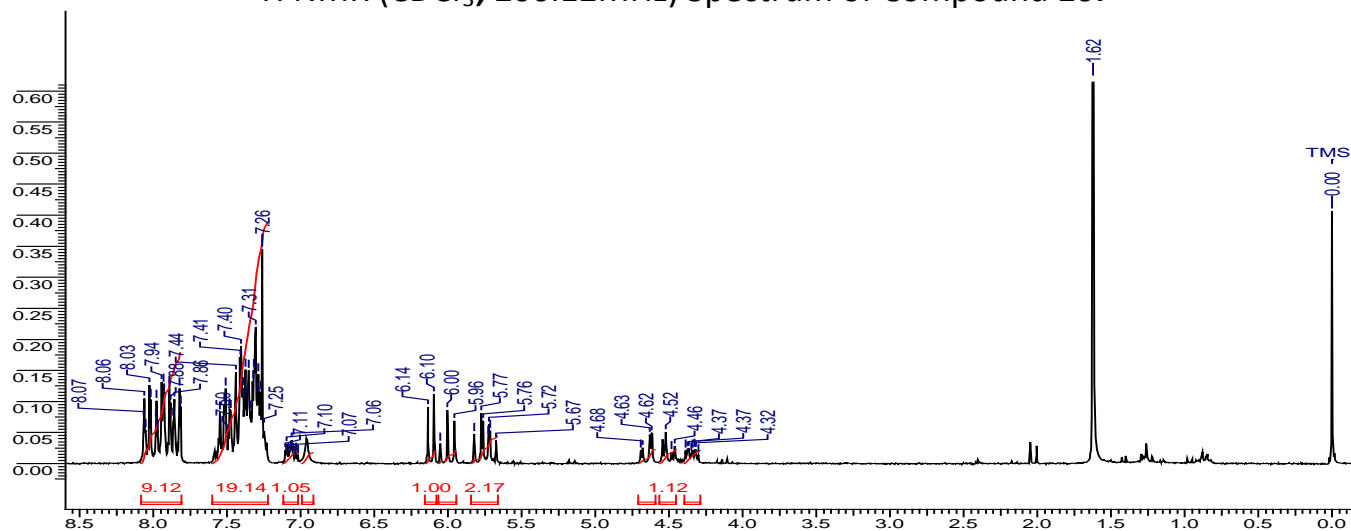

### $^{13}\text{C}$ NMR ( $\text{CDCl}_3$ , 50.32 MHz) Spectrum of Compound **10f**

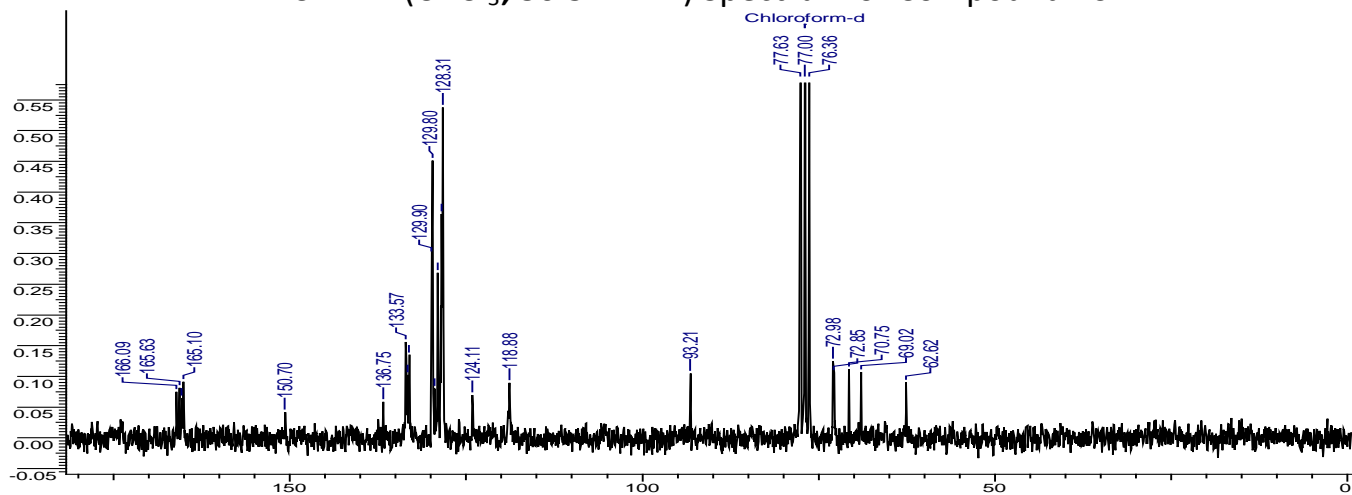

### DEPT NMR ( $\text{CDCl}_3$ , 50.32 MHz) Spectrum of Compound **10f**

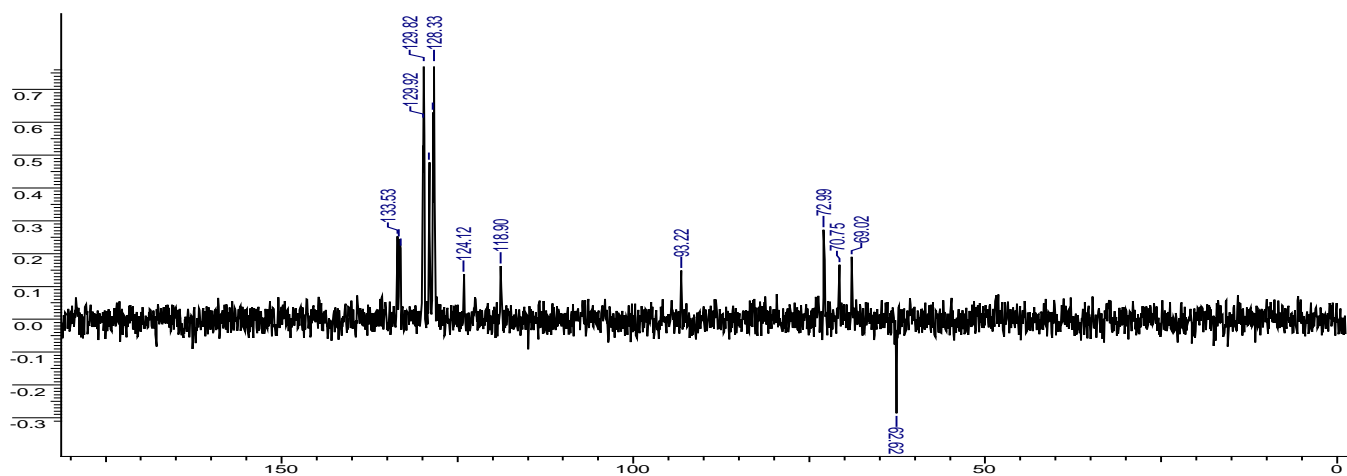

### $^1\text{H}$ NMR ( $\text{CDCl}_3$ , 200.12MHz) Spectrum of Compound **11a**

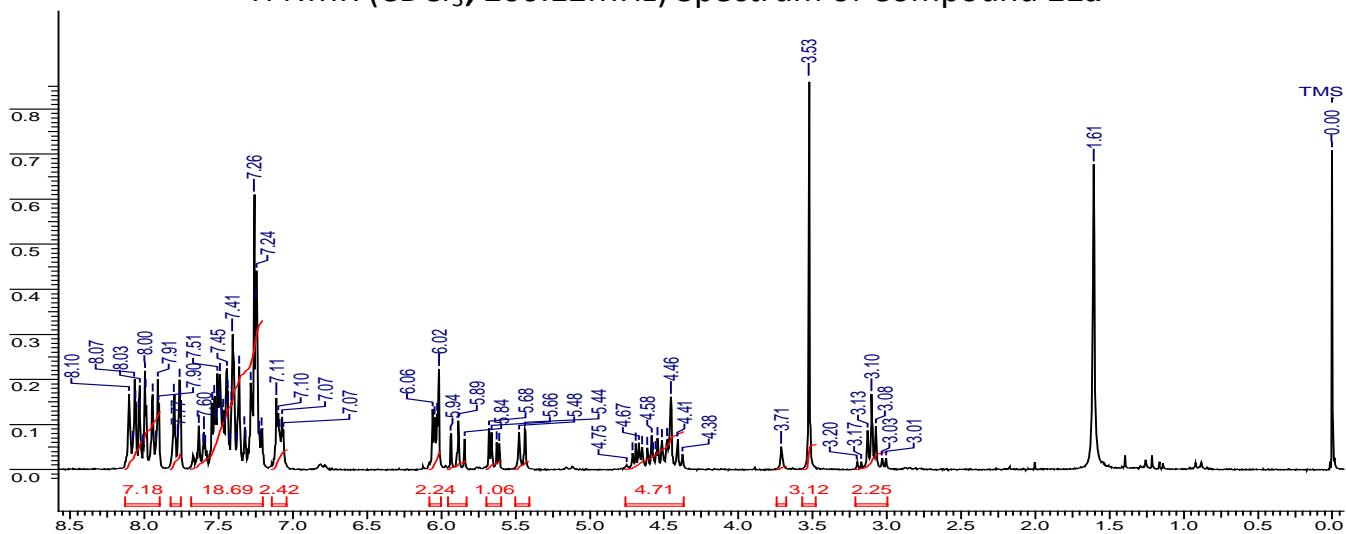

### $^{13}\text{C}$ NMR ( $\text{CDCl}_3$ , 50.32 MHz) Spectrum of Compound **11a**

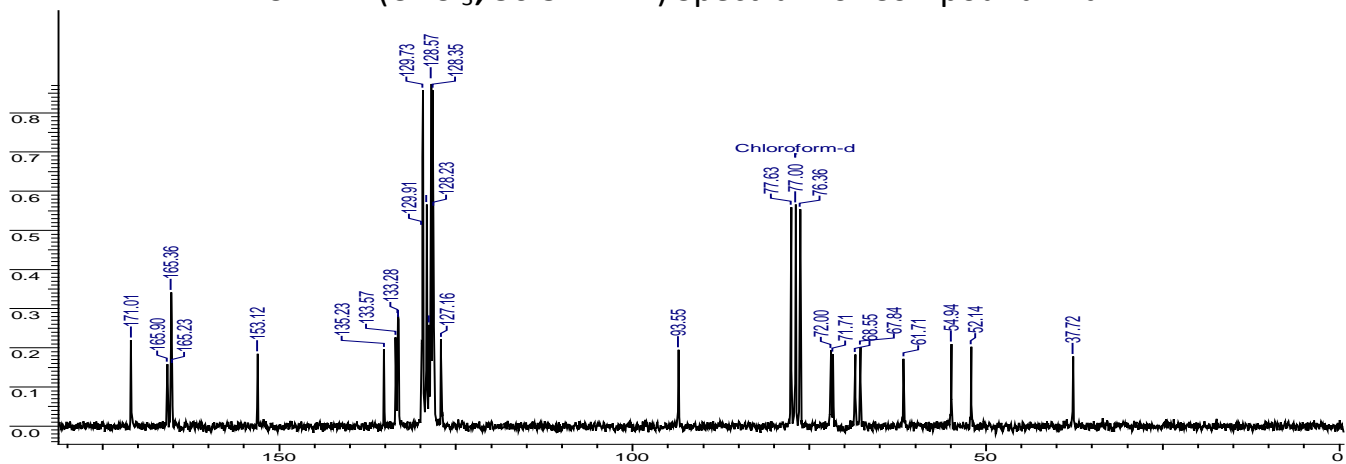

### DEPT NMR ( $\text{CDCl}_3$ , 50.32 MHz) Spectrum of Compound **11a**

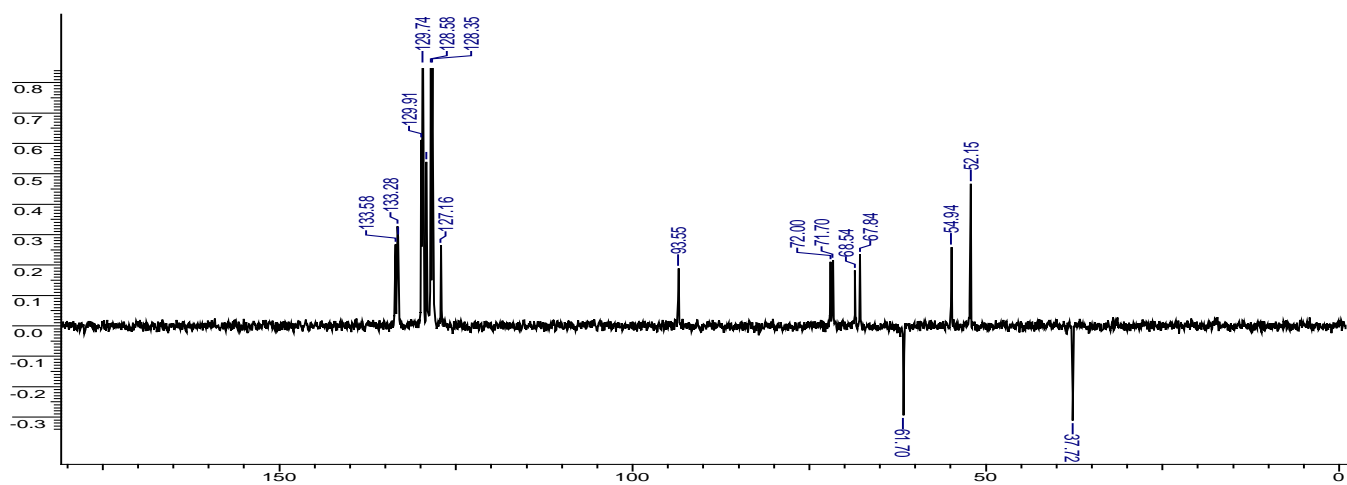

$^1\text{H}$  NMR ( $\text{CDCl}_3$ , 200.12MHz) Spectrum of Compound **11b**

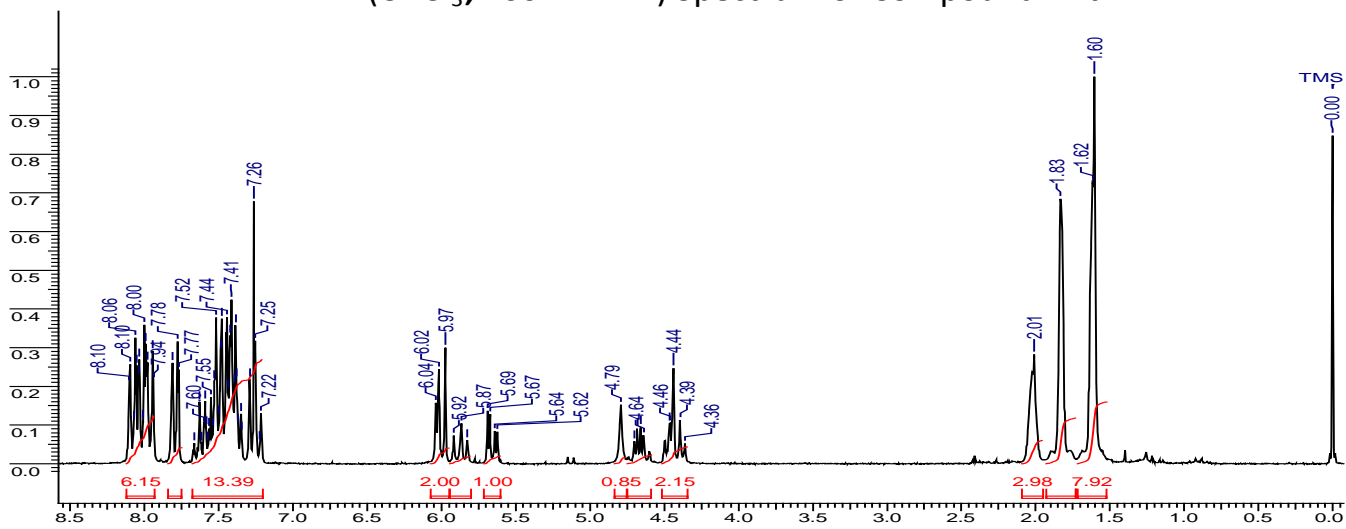

$^{13}\text{C}$  NMR ( $\text{CDCl}_3$ , 50.32 MHz) Spectrum of Compound **11b**

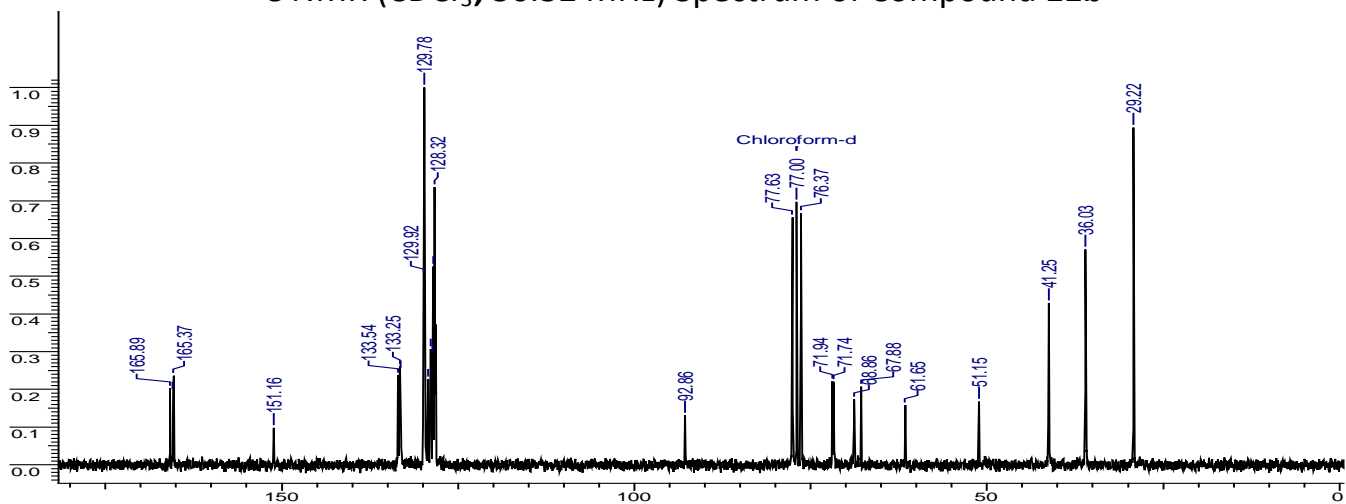

DEPT NMR ( $\text{CDCl}_3$ , 50.32 MHz) Spectrum of Compound **11b**

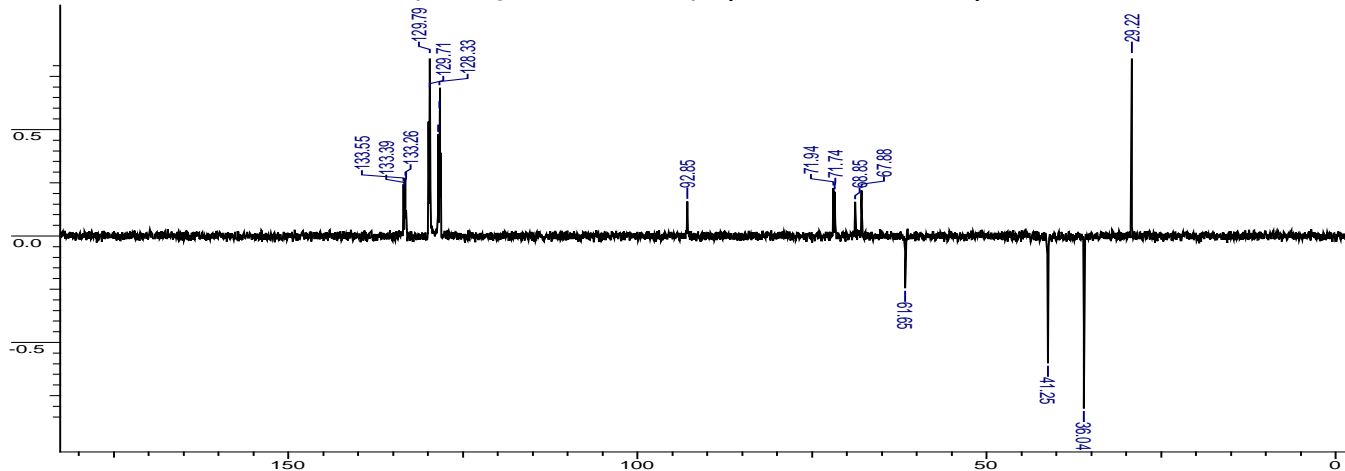

$^1\text{H}$  NMR ( $\text{CDCl}_3$ , 200.12MHz) Spectrum of Compound **12a**

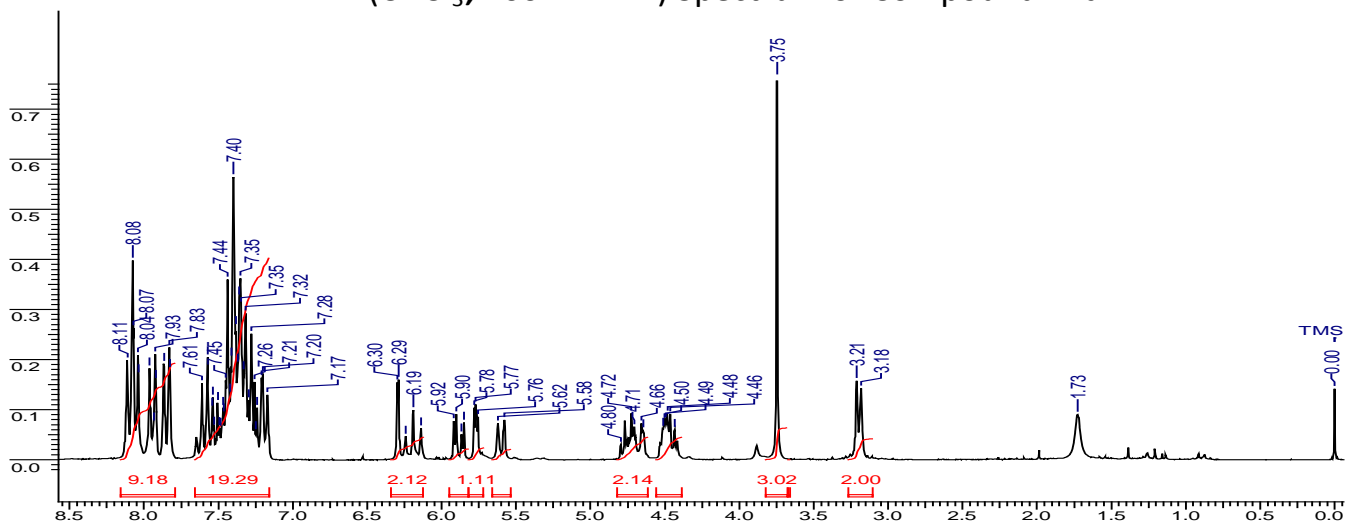

$^{13}\text{C}$  NMR ( $\text{CDCl}_3$ , 50.32 MHz) Spectrum of Compound **12a**

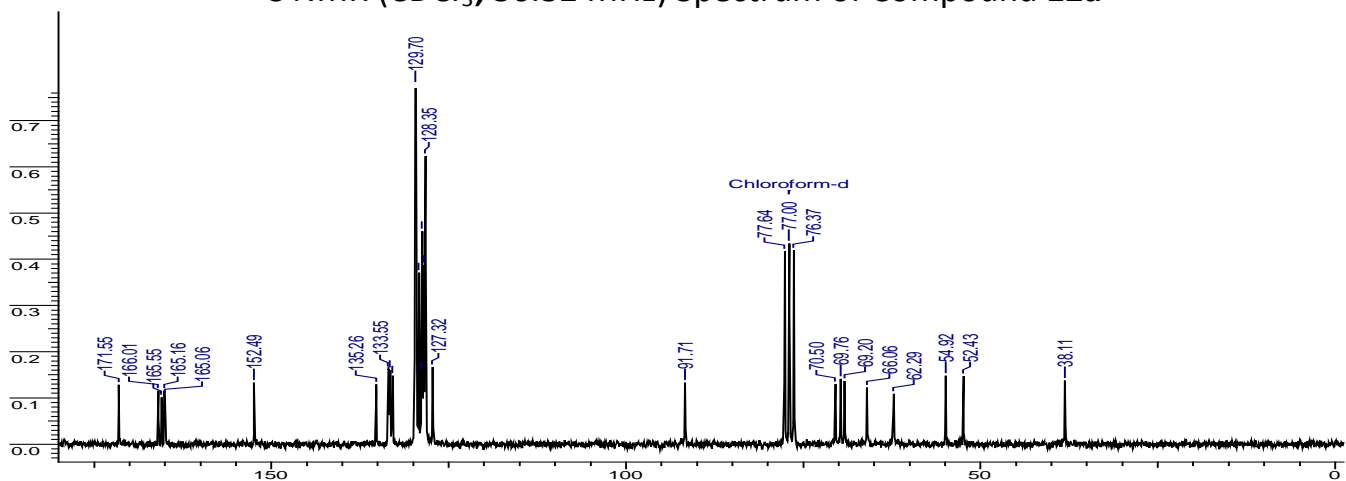

DEPT NMR ( $\text{CDCl}_3$ , 50.32 MHz) Spectrum of Compound **12a**

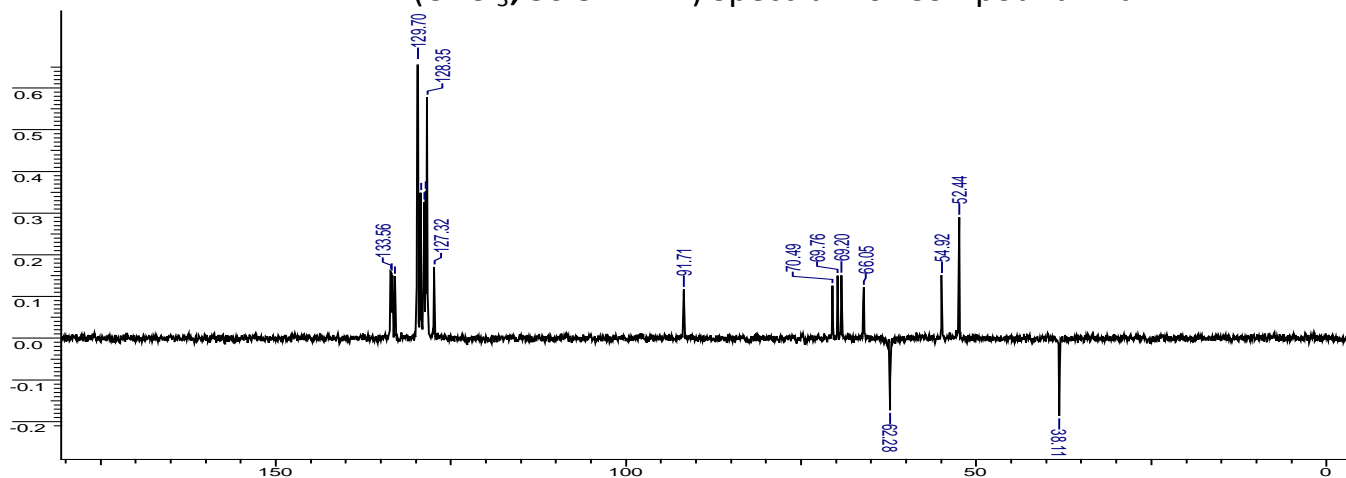

### $^1\text{H}$ NMR ( $\text{CDCl}_3$ , 200.12MHz) Spectrum of Compound **12b**

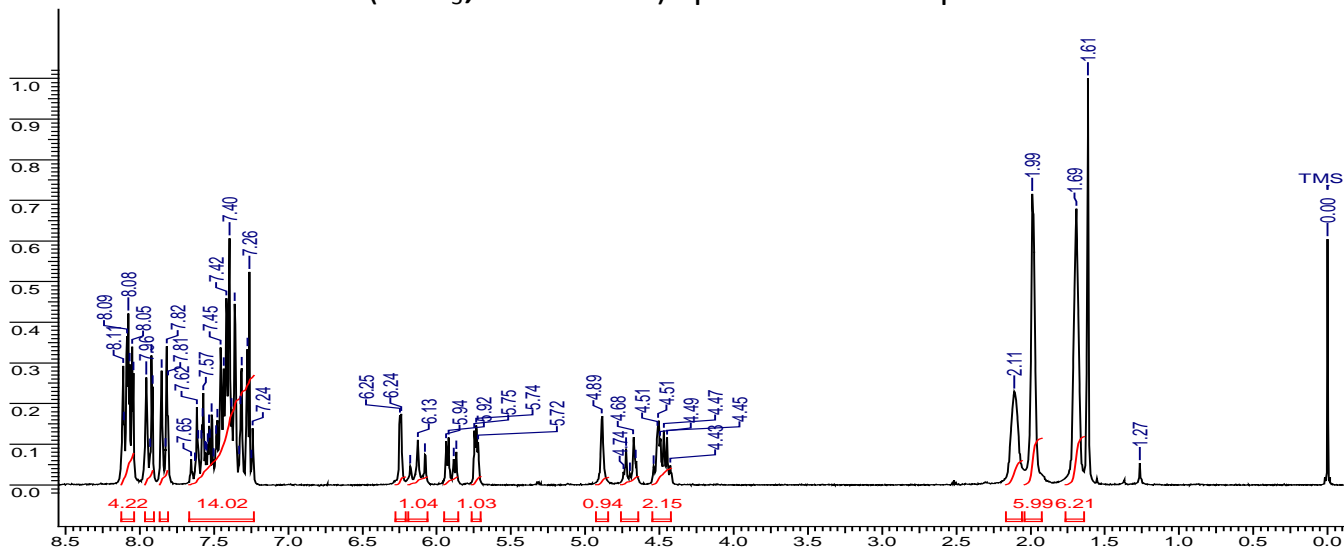

### $^{13}\text{C}$ NMR ( $\text{CDCl}_3$ , 50.32 MHz) Spectrum of Compound **12b**

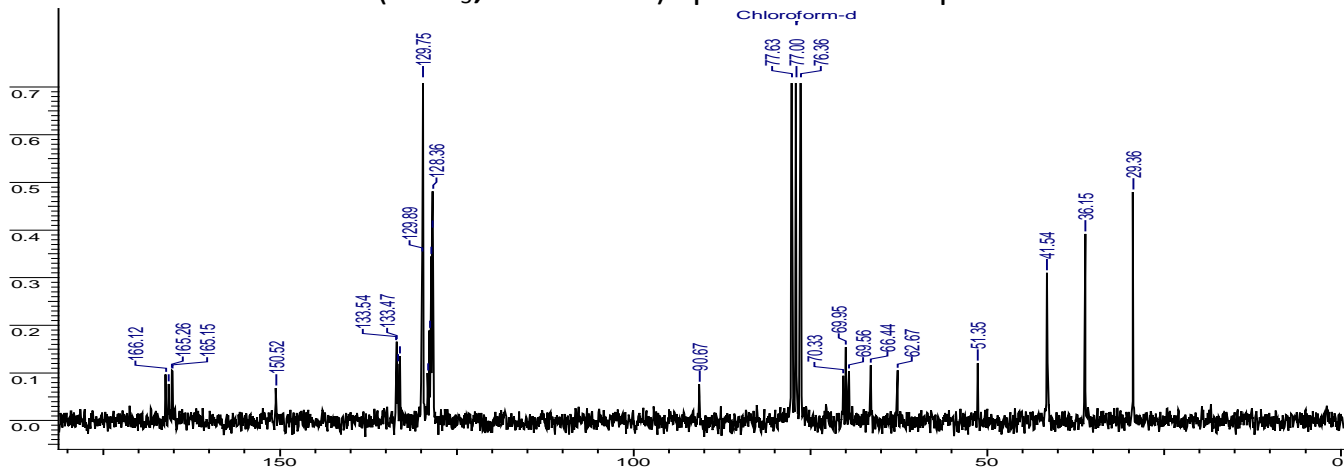

### DEPT NMR ( $\text{CDCl}_3$ , 50.32 MHz) Spectrum of Compound **12b**

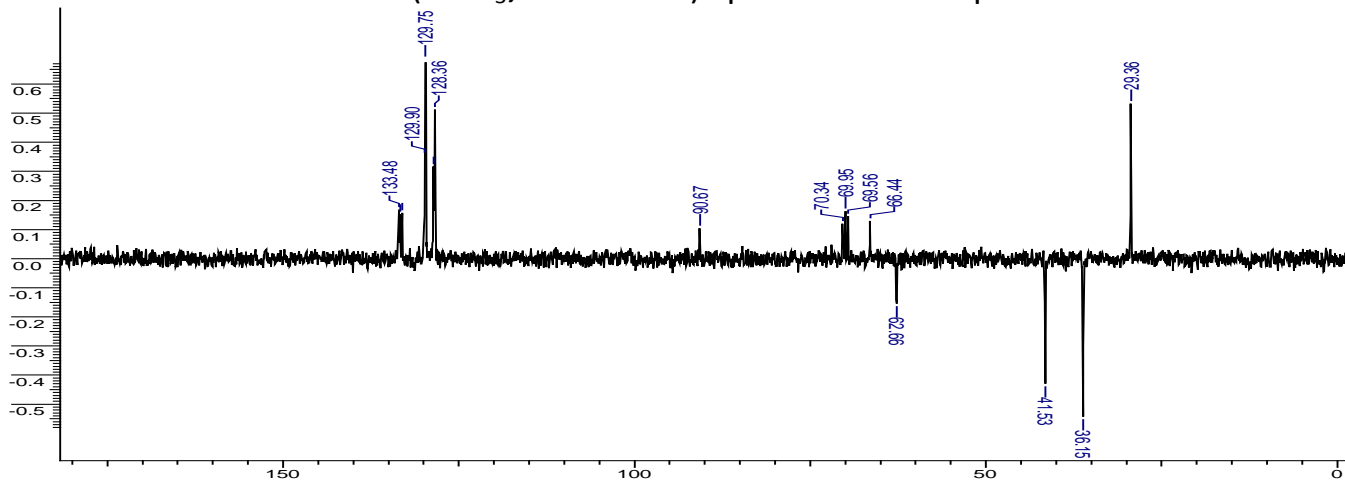

### $^1\text{H}$ NMR ( $\text{CDCl}_3$ , 200.12MHz) Spectrum of Compound **13a**

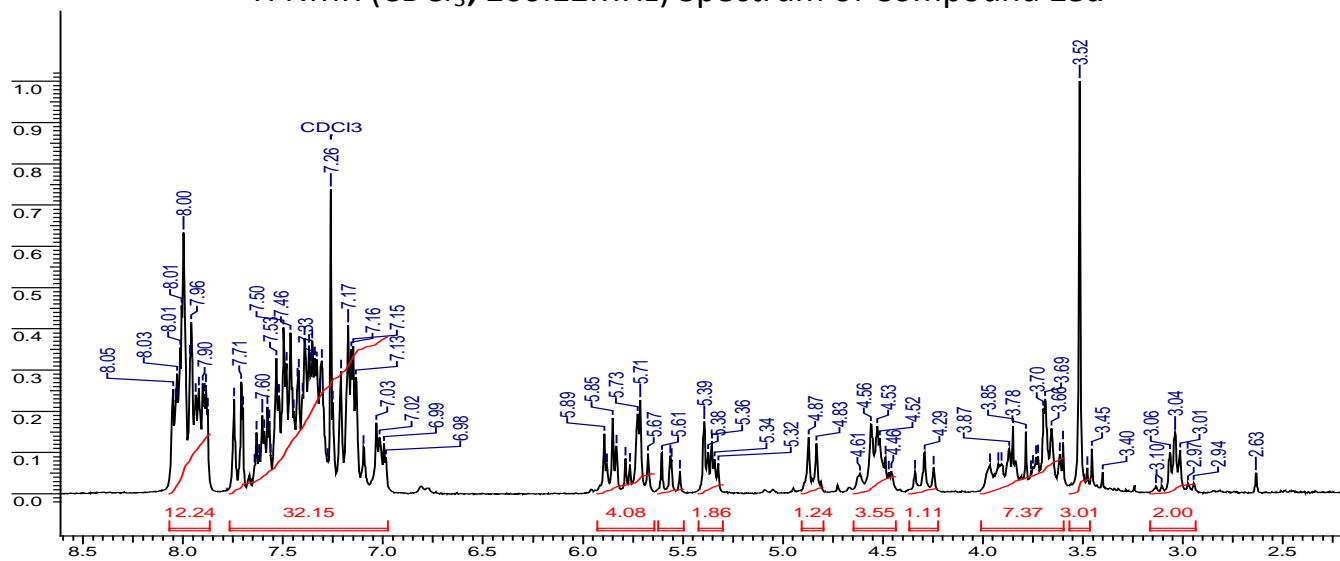

### $^{13}\text{C}$ NMR ( $\text{CDCl}_3$ , 50.32 MHz) Spectrum of Compound **13a**

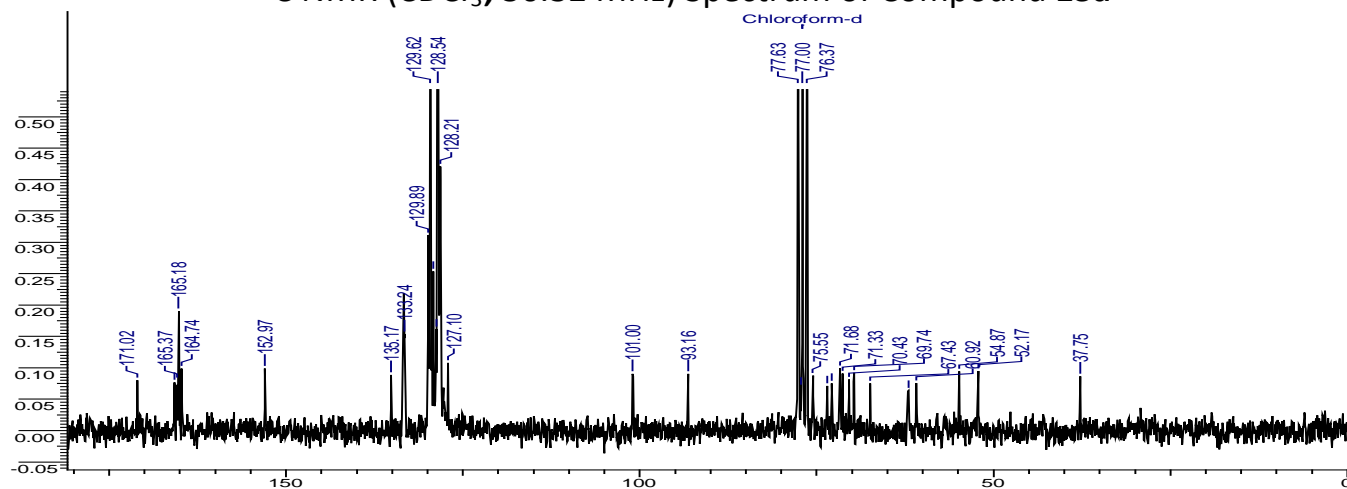

### DEPT NMR ( $\text{CDCl}_3$ , 50.32 MHz) Spectrum of Compound **13a**

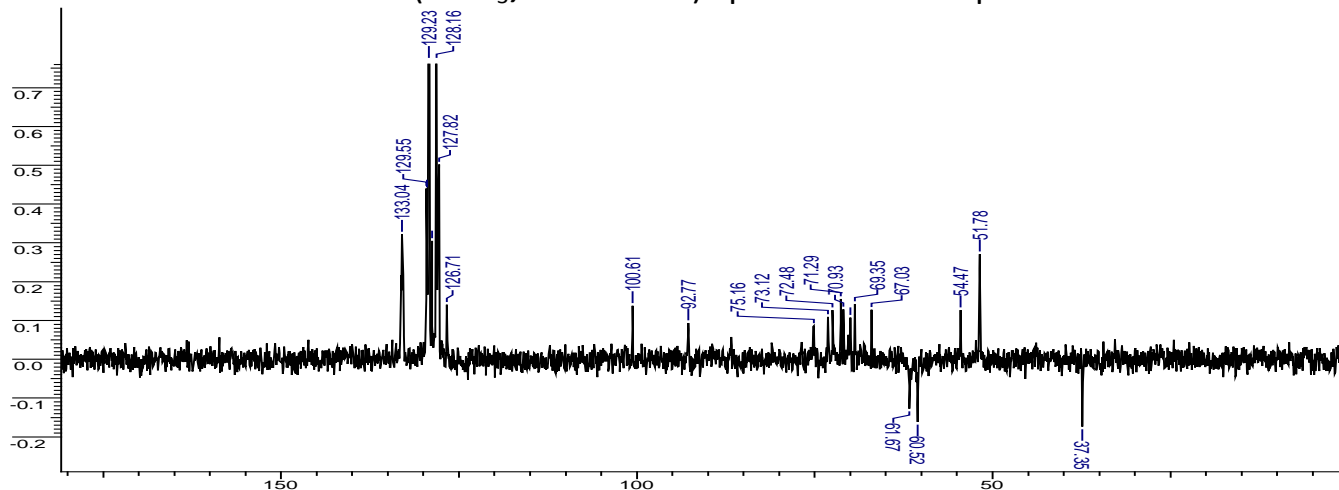

### $^1\text{H}$ NMR ( $\text{CDCl}_3$ , 200.12MHz) Spectrum of Compound **13b**

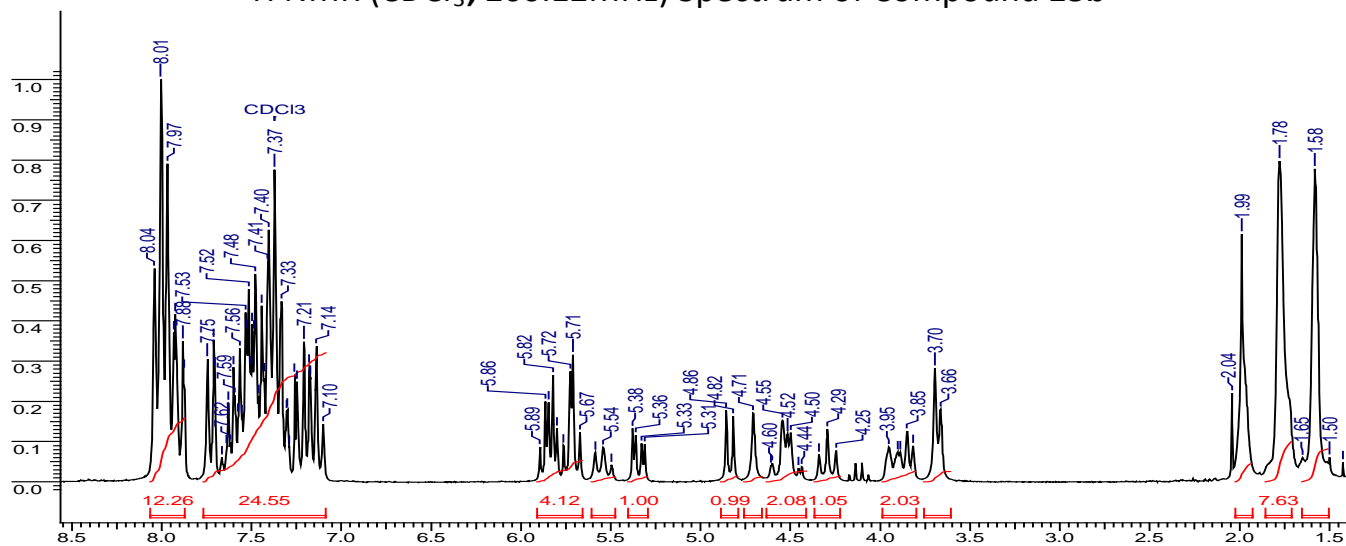

### $^{13}\text{C}$ NMR ( $\text{CDCl}_3$ , 50.32 MHz) Spectrum of Compound **13b**

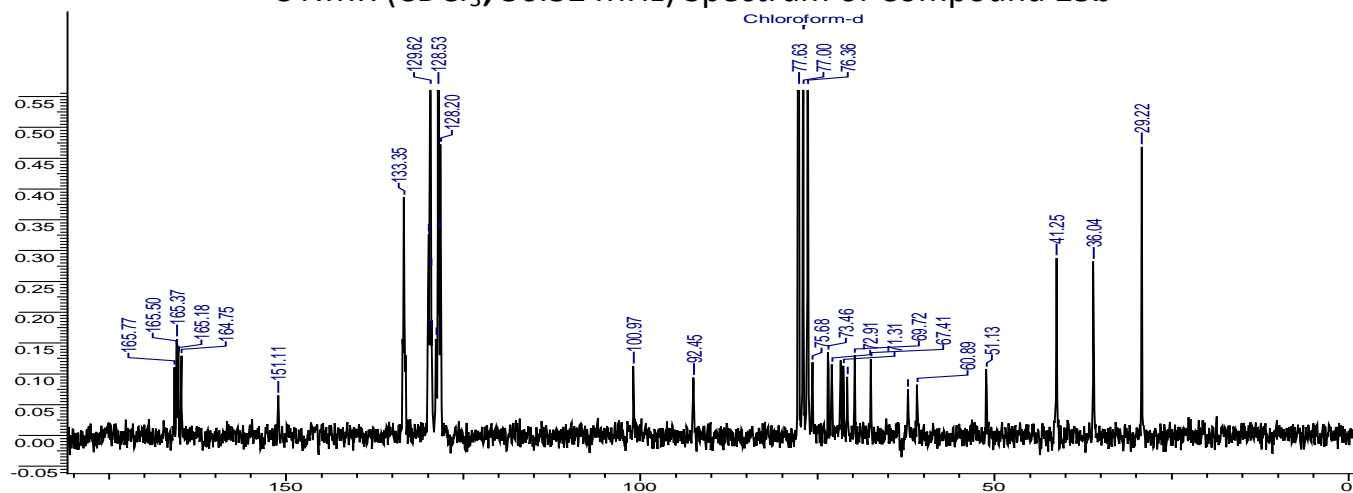

### DEPT NMR ( $\text{CDCl}_3$ , 50.32 MHz) Spectrum of Compound **13b**

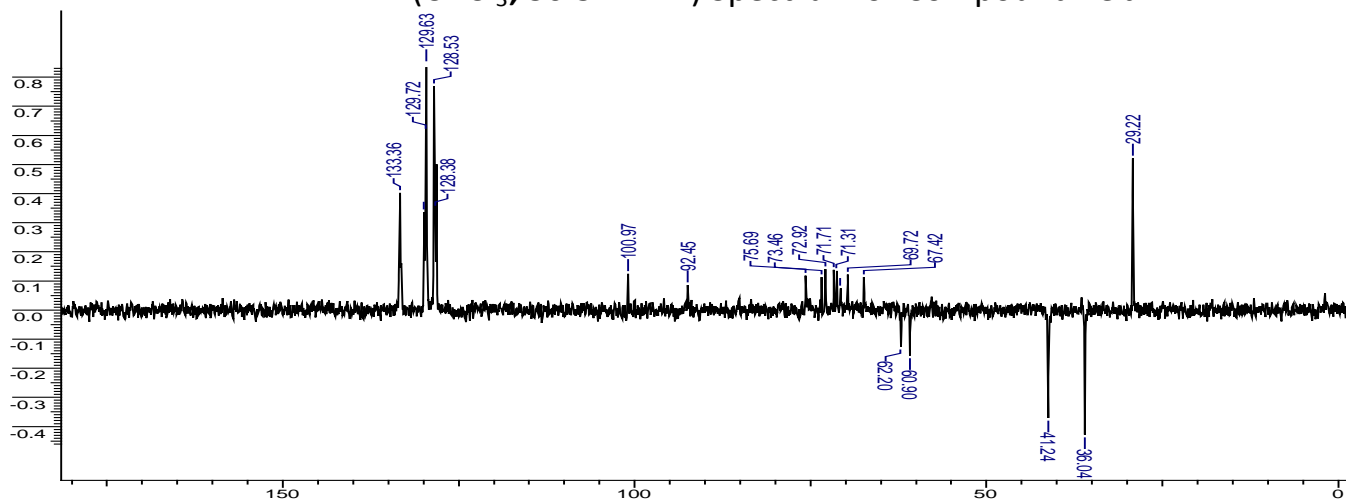

### Mass Spectral Data of All New Compounds

| Compound No. | Molecular Formula                                   | Calculated Mol. Wt. | Observed Mol. Wt. | Optical rotation $[\alpha]_D^{25}$ in CHCl <sub>3</sub> at 25°C; c 1.0 |
|--------------|-----------------------------------------------------|---------------------|-------------------|------------------------------------------------------------------------|
| <b>3a</b>    | C <sub>52</sub> H <sub>45</sub> NO <sub>14</sub> Na | 930.2738            | 930.2742          | +14.0°                                                                 |
| <b>3b</b>    | C <sub>54</sub> H <sub>47</sub> NO <sub>14</sub> Na | 956.2894            | 956.2889          | +12.0°                                                                 |
| <b>3c</b>    | C <sub>53</sub> H <sub>47</sub> NO <sub>14</sub> Na | 944.2894            | 944.2899          | +4.0°                                                                  |
| <b>4a</b>    | C <sub>52</sub> H <sub>45</sub> NO <sub>14</sub> Na | 930.2738            | 930.2735          | +58.0°                                                                 |
| <b>4b</b>    | C <sub>53</sub> H <sub>45</sub> NO <sub>14</sub> Na | 942.2738            | 942.2736          | +66.0°                                                                 |
| <b>4c</b>    | C <sub>53</sub> H <sub>47</sub> NO <sub>14</sub> Na | 944.2894            | 944.2890          | +36.0°                                                                 |
| <b>5a</b>    | C <sub>52</sub> H <sub>45</sub> NO <sub>14</sub> Na | 930.2738            | 930.2740          | -42.0°                                                                 |
| <b>5b</b>    | C <sub>54</sub> H <sub>47</sub> NO <sub>14</sub> Na | 956.2894            | 956.2893          | -30.0°                                                                 |
| <b>5c</b>    | C <sub>53</sub> H <sub>47</sub> NO <sub>14</sub> Na | 944.2894            | 944.2897          | -40.0°                                                                 |
| <b>6a</b>    | C <sub>79</sub> H <sub>67</sub> NO <sub>22</sub> Na | 1405.4052           | 1404.4048         | +46.0°                                                                 |
| <b>6b</b>    | C <sub>80</sub> H <sub>67</sub> NO <sub>22</sub> Na | 1416.4052           | 1416.4056         | +48.0°                                                                 |
| <b>6c</b>    | C <sub>81</sub> H <sub>69</sub> NO <sub>22</sub> Na | 1431.4209           | 1431.4212         | +42.0°                                                                 |
| <b>A</b>     | C <sub>43</sub> H <sub>43</sub> NO <sub>14</sub> Na | 820.2581            | 820.2577          | +3.8°                                                                  |
| <b>8</b>     | C <sub>39</sub> H <sub>35</sub> NO <sub>14</sub> Na | 764.1955            | 764.1960          | +32.9°                                                                 |
| <b>10a</b>   | C <sub>45</sub> H <sub>39</sub> NO <sub>13</sub> Na | 824.2319            | 824.2320          | +46.5°                                                                 |
| <b>10b</b>   | C <sub>45</sub> H <sub>43</sub> NO <sub>11</sub> Na | 796.2734            | 796.2730          | +34.6°                                                                 |
| <b>10c</b>   | C <sub>36</sub> H <sub>31</sub> NO <sub>11</sub> Na | 676.1795            | 676.1790          | +47.3°                                                                 |
| <b>10d</b>   | C <sub>47</sub> H <sub>53</sub> NO <sub>11</sub> Na | 830.3516            | 830.3520          | +34.4°                                                                 |
| <b>10e</b>   | C <sub>45</sub> H <sub>41</sub> NO <sub>13</sub> Na | 826.2476            | 826.2480          | +30.2°                                                                 |
| <b>10f</b>   | C <sub>41</sub> H <sub>33</sub> NO <sub>11</sub> Na | 738.1951            | 738.1950          | +29.2°                                                                 |
| <b>11a</b>   | C <sub>45</sub> H <sub>39</sub> NO <sub>13</sub> Na | 824.2319            | 824.2320          | +96.6°                                                                 |
| <b>11b</b>   | C <sub>45</sub> H <sub>43</sub> NO <sub>11</sub> Na | 796.2734            | 796.2730          | +97.3°                                                                 |
| <b>12a</b>   | C <sub>45</sub> H <sub>39</sub> NO <sub>13</sub> Na | 824.2319            | 824.2320          | -17.8°                                                                 |
| <b>12b</b>   | C <sub>45</sub> H <sub>43</sub> NO <sub>11</sub> Na | 796.2734            | 796.2730          | -41.7°                                                                 |
| <b>13a</b>   | C <sub>72</sub> H <sub>61</sub> NO <sub>21</sub> Na | 1298.3634           | 1298.3630         | +54.2°                                                                 |
| <b>13b</b>   | C <sub>72</sub> H <sub>65</sub> NO <sub>19</sub> Na | 1270.4048           | 1270.4050         | +48.0°                                                                 |
